# Supplementary material for: Diagnostic Performance of Various Ultrasound Risk Stratification Systems for Benign and Malignant Thyroid Nodules: A Meta-Analysis
Source: MDPI journal article supplement (doi:10.3390/cancers15020424), 2023-01-09
Supplement: s1 [file s1]

**Supplementary Table S1. Search terms by database**

| Database | Search | Search terms                                                                                                                                                                                                                                                                                                                                                                                                                                                                                                                                                                                                                                                                                                                                                                                                                                                                                                                                                                                                                                                                                                                                                                                                                                                                                                                                                                                                                                                                                                                                                                                 |
|----------|--------|----------------------------------------------------------------------------------------------------------------------------------------------------------------------------------------------------------------------------------------------------------------------------------------------------------------------------------------------------------------------------------------------------------------------------------------------------------------------------------------------------------------------------------------------------------------------------------------------------------------------------------------------------------------------------------------------------------------------------------------------------------------------------------------------------------------------------------------------------------------------------------------------------------------------------------------------------------------------------------------------------------------------------------------------------------------------------------------------------------------------------------------------------------------------------------------------------------------------------------------------------------------------------------------------------------------------------------------------------------------------------------------------------------------------------------------------------------------------------------------------------------------------------------------------------------------------------------------------|
| PubMed   | #1     | "Thyroid Neoplasms"[Mesh]                                                                                                                                                                                                                                                                                                                                                                                                                                                                                                                                                                                                                                                                                                                                                                                                                                                                                                                                                                                                                                                                                                                                                                                                                                                                                                                                                                                                                                                                                                                                                                    |
|          | #2     | "Thyroid Neoplasms"[TW] OR "Neoplasm, Thyroid"[TW] OR "Thyroid Neoplasm"[TW] OR "Neoplasms, Thyroid"[TW] OR "Thyroid Carcinoma"[TW] OR "Carcinoma, Thyroid"[TW] OR "Carcinomas, Thyroid"[TW] OR "Thyroid Carcinomas"[TW] OR "Cancer of Thyroid"[TW] OR "Thyroid Cancers"[TW] OR "Thyroid Cancer"[TW] OR "Cancer, Thyroid"[TW] OR "Cancers, Thyroid"[TW] OR "Cancer of the Thyroid"[TW] OR "Thyroid Adenoma"[TW] OR "Adenoma, Thyroid"[TW] OR "Adenomas, Thyroid"[TW] OR "Thyroid Adenomas"[TW] OR "thyroid tumor"[TW] OR "neoplasm of thyroid gland"[TW] OR "neoplastic thyroid"[TW] OR "neoplastic thyroid gland"[TW] OR "thyroid gland neoplasia"[TW] OR "thyroid gland neoplasm"[TW] OR "thyroid gland tumor"[TW] OR "thyroid gland tumour"[TW] OR "thyroid neoplasia"[TW] OR "thyroid tumorigenesis"[TW] OR "thyroid tumour"[TW] OR "thyroidal tumor"[TW] OR "thyroidal tumour"[TW] OR "tumor of thyroid"[TW] OR "tumor of thyroid gland"[TW] OR "tumor, thyroid gland"[TW] OR "tumour of thyroid"[TW] OR "tumour of thyroid gland"[TW] OR "tumour, thyroid gland"[TW]                                                                                                                                                                                                                                                                                                                                                                                                                                                                                                                   |
|          | #3     | "Thyroid Nodule"[Mesh]                                                                                                                                                                                                                                                                                                                                                                                                                                                                                                                                                                                                                                                                                                                                                                                                                                                                                                                                                                                                                                                                                                                                                                                                                                                                                                                                                                                                                                                                                                                                                                       |
|          | #4     | "Thyroid Nodule"[TW] OR "Nodule, Thyroid"[TW] OR "Nodules, Thyroid"[TW] OR "Thyroid Nodules"[TW] OR "colloid nodule (thyroid)"[TW] OR "colloidal nodule (thyroid)"[TW] OR "nodule of the thyroid gland"[TW] OR "nodule of thyroid gland"[TW] OR "nodule, thyroid gland"[TW] OR "thyroid colloid nodule"[TW] OR "thyroid colloidal nodule"[TW] OR "thyroid gland nodule"[TW] OR "thyroid solitary nodule"[TW] OR "thyroidal gland nodule"[TW] OR "thyroidal nodule"[TW] OR "thyroideal nodule"[TW]                                                                                                                                                                                                                                                                                                                                                                                                                                                                                                                                                                                                                                                                                                                                                                                                                                                                                                                                                                                                                                                                                            |
|          | #5     | "thyroid mass"[TW]                                                                                                                                                                                                                                                                                                                                                                                                                                                                                                                                                                                                                                                                                                                                                                                                                                                                                                                                                                                                                                                                                                                                                                                                                                                                                                                                                                                                                                                                                                                                                                           |
|          | #6     | #1 OR #2 OR #3 OR #4 OR #5                                                                                                                                                                                                                                                                                                                                                                                                                                                                                                                                                                                                                                                                                                                                                                                                                                                                                                                                                                                                                                                                                                                                                                                                                                                                                                                                                                                                                                                                                                                                                                   |
|          | #7     | "Ultrasonography"[Mesh]                                                                                                                                                                                                                                                                                                                                                                                                                                                                                                                                                                                                                                                                                                                                                                                                                                                                                                                                                                                                                                                                                                                                                                                                                                                                                                                                                                                                                                                                                                                                                                      |
|          | #8     | "ultrasound"[TW] OR "Ultrasonography"[TW] OR "Diagnostic Ultrasound"[TW] OR "Diagnostic Ultrasounds"[TW] OR "Ultrasound, Diagnostic"[TW] OR "Ultrasounds, Diagnostic"[TW] OR "Ultrasound Imaging"[TW] OR "Imaging, Ultrasound"[TW] OR "Imagings, Ultrasound"[TW] OR "Echotomography"[TW] OR "Ultrasonic Imaging"[TW] OR "Imaging, Ultrasonic"[TW] OR "Sonography, Medical"[TW] OR "Medical Sonography"[TW] OR "Ultrasonographic Imaging"[TW] OR "Imaging, Ultrasonographic"[TW] OR "Imagings, Ultrasonographic"[TW] OR "Ultrasonographic Imagings"[TW] OR "Echography"[TW] OR "Diagnosis, Ultrasonic"[TW] OR "Diagnoses, Ultrasonic"[TW] OR "Ultrasonic Diagnoses"[TW] OR "Ultrasonic Diagnosis"[TW] OR "Echotomography, Computer"[TW] OR "Computer Echotomography"[TW] OR "Tomography, Ultrasonic"[TW] OR "Ultrasonic Tomography"[TW] OR "diagnostic ultrasonic examination"[TW] OR "diagnostic ultrasonic imaging"[TW] OR "diagnostic ultrasonic method"[TW] OR "doptone"[TW] OR "duplex echography"[TW] OR "echogram"[TW] OR "echographic evaluation"[TW] OR "echoscopy"[TW] OR "echosound"[TW] OR "high resolution echography"[TW] OR "scanning, ultrasonic"[TW] OR "sonogram"[TW] OR "sonographic examination"[TW] OR "sonographic screening"[TW] OR "sonography"[TW] OR "ultrasonic detection"[TW] OR "ultrasonic echo"[TW] OR "ultrasonic examination"[TW] OR "ultrasonic scanning"[TW] OR "ultrasonic scintillation"[TW] OR "ultrasonogram"[TW] OR "ultrasonographic examination"[TW] OR "ultrasonographic screening"[TW] OR "ultrasound diagnosis"[TW] OR "ultrasound scanning"[TW] |
|          | #9     | "Biopsy"[Mesh]                                                                                                                                                                                                                                                                                                                                                                                                                                                                                                                                                                                                                                                                                                                                                                                                                                                                                                                                                                                                                                                                                                                                                                                                                                                                                                                                                                                                                                                                                                                                                                               |
|          | #10    | "Biopsy"[TW] OR "Biopsies"[TW] OR "bioptic diagnosis"[TW] OR "bioptical diagnosis"[TW] OR "rebiopsy"[TW]                                                                                                                                                                                                                                                                                                                                                                                                                                                                                                                                                                                                                                                                                                                                                                                                                                                                                                                                                                                                                                                                                                                                                                                                                                                                                                                                                                                                                                                                                     |
|          | #11    | "Biopsy, Fine-Needle"[Mesh]                                                                                                                                                                                                                                                                                                                                                                                                                                                                                                                                                                                                                                                                                                                                                                                                                                                                                                                                                                                                                                                                                                                                                                                                                                                                                                                                                                                                                                                                                                                                                                  |

|     |                                                                                                                                                                                                                                                                                                                                                                                                                                                                                                                                                                                                                                                                                                                                                                                                                                                                                                                                                                                                                                                                                       |
|-----|---------------------------------------------------------------------------------------------------------------------------------------------------------------------------------------------------------------------------------------------------------------------------------------------------------------------------------------------------------------------------------------------------------------------------------------------------------------------------------------------------------------------------------------------------------------------------------------------------------------------------------------------------------------------------------------------------------------------------------------------------------------------------------------------------------------------------------------------------------------------------------------------------------------------------------------------------------------------------------------------------------------------------------------------------------------------------------------|
| #12 | "Biopsy, Fine-Needle"[TW] OR "Biopsies, Fine-Needle"[TW] OR "Biopsy, Fine Needle"[TW] OR "Fine-Needle Biopsies"[TW] OR "Fine-Needle Biopsy"[TW] OR "Fine Needle Biopsy"[TW] OR "Biopsies, Fine Needle"[TW] OR "Fine Needle Biopsies"[TW] OR "Needle Biopsies, Fine"[TW] OR "Needle Biopsy, Fine"[TW] OR "Aspiration Biopsy, Fine-Needle"[TW] OR "Aspiration Biopsies, Fine-Needle"[TW] OR "Aspiration Biopsy, Fine Needle"[TW] OR "Biopsies, Fine-Needle Aspiration"[TW] OR "Biopsy, Fine-Needle Aspiration"[TW] OR "Fine-Needle Aspiration Biopsies"[TW] OR "Fine-Needle Aspiration Biopsy"[TW] OR "Fine-Needle Aspiration"[TW] OR "Aspiration, Fine-Needle"[TW] OR "Aspirations, Fine-Needle"[TW] OR "Fine Needle Aspiration"[TW] OR "Fine-Needle Aspirations"[TW] OR "fine needle aspiration biopsy"[TW] OR "fine core needle biopsy"[TW] OR "fine needle aspiration cytology"[TW] OR "fine needle aspirations"[TW] OR "FNA (fine needle aspiration)"[TW] OR "FNAB (fine needle aspiration biopsy)"[TW] OR "FNAC (fine needle aspiration cytology)"[TW] OR "needle aspiration"[TW] |
| #13 | #7 OR #8 OR #9 OR #10 OR #11 OR #12                                                                                                                                                                                                                                                                                                                                                                                                                                                                                                                                                                                                                                                                                                                                                                                                                                                                                                                                                                                                                                                   |
| #14 | "Risk Assessment"[Mesh]                                                                                                                                                                                                                                                                                                                                                                                                                                                                                                                                                                                                                                                                                                                                                                                                                                                                                                                                                                                                                                                               |
| #15 | "Risk Assessment"[TW] OR "Risk Assessments"[TW] OR "Health Risk Assessment"[TW] OR "Assessment, Health Risk"[TW] OR "Health Risk Assessments"[TW] OR "Risk Assessment, Health"[TW] OR "Assessment, Risk"[TW] OR "Risks and Benefits"[TW] OR "Benefits and Risks"[TW] OR "Risk Analysis"[TW] OR "Analysis, Risk"[TW] OR "Risk Analyses"[TW] OR "Benefit-Risk Assessment"[TW] OR "Assessment, Benefit-Risk"[TW] OR "Benefit Risk Assessment"[TW] OR "Benefit-Risk Assessments"[TW] OR "Risk-Benefit Assessment"[TW] OR "Assessment, Risk-Benefit"[TW] OR "Risk Benefit Assessment"[TW] OR "Risk-Benefit Assessments"[TW] OR "risk stratification"[TW] OR "assessment, safety"[TW] OR "risk adjustment"[TW] OR "risk evaluation"[TW] OR "safety assessment"[TW]                                                                                                                                                                                                                                                                                                                          |
| #16 | "Korean Thyroid Association"[TW] OR "Korean Society of Thyroid Radiology"[TW] OR "American Thyroid Association"[TW] OR "American College of Radiology"[TW] OR "European Thyroid Association"[TW] OR "American Association of Clinical Endocrinologists"[TW] OR "Society of Radiologists"[TW] OR "KTA"[TW] OR "KSThR"[TW] OR "ATA"[TW] OR "ACR"[TW] OR "ETA"[TW] OR "SRU"[TW] OR "thyroid imaging reporting and data system"[TW] OR "TIRADS"[TW] OR "TI-RADS"[TW] OR "Kwak-TIRADS"[TW] OR "K-TIRADS"[TW] OR "ACR-TIRADS"[TW] OR "EU-TIRADS"[TW]                                                                                                                                                                                                                                                                                                                                                                                                                                                                                                                                        |
| #17 | #14 OR #15 OR #16                                                                                                                                                                                                                                                                                                                                                                                                                                                                                                                                                                                                                                                                                                                                                                                                                                                                                                                                                                                                                                                                     |
| #18 | #13 AND #17                                                                                                                                                                                                                                                                                                                                                                                                                                                                                                                                                                                                                                                                                                                                                                                                                                                                                                                                                                                                                                                                           |
| #19 | #6 AND #18                                                                                                                                                                                                                                                                                                                                                                                                                                                                                                                                                                                                                                                                                                                                                                                                                                                                                                                                                                                                                                                                            |
| #20 | #19 NOT ("Animals"[Mesh] NOT ("Animals"[Mesh] AND "Humans"[Mesh]))                                                                                                                                                                                                                                                                                                                                                                                                                                                                                                                                                                                                                                                                                                                                                                                                                                                                                                                                                                                                                    |

| Database | Search | Search terms                                                                                                                                                                                                                                                                                                                                                                                                                                                                                                                                                                                                                                                                                                                                                                                                                                                                                                                                                                                                                                                                                                                                                                                                                                                                                                                                                                       |
|----------|--------|------------------------------------------------------------------------------------------------------------------------------------------------------------------------------------------------------------------------------------------------------------------------------------------------------------------------------------------------------------------------------------------------------------------------------------------------------------------------------------------------------------------------------------------------------------------------------------------------------------------------------------------------------------------------------------------------------------------------------------------------------------------------------------------------------------------------------------------------------------------------------------------------------------------------------------------------------------------------------------------------------------------------------------------------------------------------------------------------------------------------------------------------------------------------------------------------------------------------------------------------------------------------------------------------------------------------------------------------------------------------------------|
| EMBASE   | #1     | "thyroid tumor"/exp                                                                                                                                                                                                                                                                                                                                                                                                                                                                                                                                                                                                                                                                                                                                                                                                                                                                                                                                                                                                                                                                                                                                                                                                                                                                                                                                                                |
|          | #2     | "Thyroid Neoplasms":ti,ab,kw,de OR "Neoplasm, Thyroid":ti,ab,kw,de OR "Thyroid Neoplasm":ti,ab,kw,de OR "Neoplasms, Thyroid":ti,ab,kw,de OR "Thyroid Carcinoma":ti,ab,kw,de OR "Carcinoma, Thyroid":ti,ab,kw,de OR "Carcinomas, Thyroid":ti,ab,kw,de OR "Thyroid Carcinomas":ti,ab,kw,de OR "Cancer of Thyroid":ti,ab,kw,de OR "Thyroid Cancers":ti,ab,kw,de OR "Thyroid Cancer":ti,ab,kw,de OR "Cancer, Thyroid":ti,ab,kw,de OR "Cancers, Thyroid":ti,ab,kw,de OR "Cancer of the Thyroid":ti,ab,kw,de OR "Thyroid Adenoma":ti,ab,kw,de OR "Adenoma, Thyroid":ti,ab,kw,de OR "Adenomas, Thyroid":ti,ab,kw,de OR "Thyroid Adenomas":ti,ab,kw,de OR "thyroid tumor":ti,ab,kw,de OR "neoplasm of thyroid gland":ti,ab,kw,de OR "neoplastic thyroid":ti,ab,kw,de OR "neoplastic thyroid gland":ti,ab,kw,de OR "thyroid gland neoplasia":ti,ab,kw,de OR "thyroid gland neoplasm":ti,ab,kw,de OR "thyroid gland tumor":ti,ab,kw,de OR "thyroid gland tumour":ti,ab,kw,de OR "thyroid neoplasia":ti,ab,kw,de OR "thyroid tumorigenesis":ti,ab,kw,de OR "thyroid tumour":ti,ab,kw,de OR "thyroidal tumor":ti,ab,kw,de OR "thyroidal tumour":ti,ab,kw,de OR "tumor of thyroid":ti,ab,kw,de OR "tumor of thyroid gland":ti,ab,kw,de OR "tumor, thyroid gland":ti,ab,kw,de OR "tumour of thyroid":ti,ab,kw,de OR "tumour of thyroid gland":ti,ab,kw,de OR "tumour, thyroid gland":ti,ab,kw,de |
|          | #3     | "thyroid nodule"/exp                                                                                                                                                                                                                                                                                                                                                                                                                                                                                                                                                                                                                                                                                                                                                                                                                                                                                                                                                                                                                                                                                                                                                                                                                                                                                                                                                               |

|     |                                                                                                                                                                                                                                                                                                                                                                                                                                                                                                                                                                                                                                                                                                                                                                                                                                                                                                                                                                                                                                                                                                                                                                                                                                                                                                                                                                                                                                                                                                                                                                                                                                                                                                                                                                                                                                                                                                                                                                                                                              |
|-----|------------------------------------------------------------------------------------------------------------------------------------------------------------------------------------------------------------------------------------------------------------------------------------------------------------------------------------------------------------------------------------------------------------------------------------------------------------------------------------------------------------------------------------------------------------------------------------------------------------------------------------------------------------------------------------------------------------------------------------------------------------------------------------------------------------------------------------------------------------------------------------------------------------------------------------------------------------------------------------------------------------------------------------------------------------------------------------------------------------------------------------------------------------------------------------------------------------------------------------------------------------------------------------------------------------------------------------------------------------------------------------------------------------------------------------------------------------------------------------------------------------------------------------------------------------------------------------------------------------------------------------------------------------------------------------------------------------------------------------------------------------------------------------------------------------------------------------------------------------------------------------------------------------------------------------------------------------------------------------------------------------------------------|
| #4  | "Thyroid Nodule":ti,ab,kw,de OR "Nodule, Thyroid":ti,ab,kw,de OR "Nodules, Thyroid":ti,ab,kw,de OR "Thyroid Nodules":ti,ab,kw,de OR "colloid nodule (thyroid)":ti,ab,kw,de OR "colloidal nodule (thyroid)":ti,ab,kw,de OR "nodule of the thyroid gland":ti,ab,kw,de OR "nodule of thyroid gland":ti,ab,kw,de OR "nodule, thyroid gland":ti,ab,kw,de OR "thyroid colloid nodule":ti,ab,kw,de OR "thyroid colloidal nodule":ti,ab,kw,de OR "thyroid gland nodule":ti,ab,kw,de OR "thyroid solitary nodule":ti,ab,kw,de OR "thyroidal gland nodule":ti,ab,kw,de OR "thyroidal nodule":ti,ab,kw,de OR "thyroideal nodule":ti,ab,kw,de                                                                                                                                                                                                                                                                                                                                                                                                                                                                                                                                                                                                                                                                                                                                                                                                                                                                                                                                                                                                                                                                                                                                                                                                                                                                                                                                                                                            |
| #5  | "thyroid mass":ti,ab,kw,de                                                                                                                                                                                                                                                                                                                                                                                                                                                                                                                                                                                                                                                                                                                                                                                                                                                                                                                                                                                                                                                                                                                                                                                                                                                                                                                                                                                                                                                                                                                                                                                                                                                                                                                                                                                                                                                                                                                                                                                                   |
| #6  | #1 OR #2 OR #3 OR #4 OR #5                                                                                                                                                                                                                                                                                                                                                                                                                                                                                                                                                                                                                                                                                                                                                                                                                                                                                                                                                                                                                                                                                                                                                                                                                                                                                                                                                                                                                                                                                                                                                                                                                                                                                                                                                                                                                                                                                                                                                                                                   |
| #7  | "echography"/exp                                                                                                                                                                                                                                                                                                                                                                                                                                                                                                                                                                                                                                                                                                                                                                                                                                                                                                                                                                                                                                                                                                                                                                                                                                                                                                                                                                                                                                                                                                                                                                                                                                                                                                                                                                                                                                                                                                                                                                                                             |
| #8  | "ultrasound":ti,ab,kw,de OR "Ultrasonography":ti,ab,kw,de OR "Diagnostic Ultrasound":ti,ab,kw,de OR "Diagnostic Ultrasounds":ti,ab,kw,de OR "Ultrasound, Diagnostic":ti,ab,kw,de OR "Ultrasounds, Diagnostic":ti,ab,kw,de OR "Ultrasound Imaging":ti,ab,kw,de OR "Imaging, Ultrasound":ti,ab,kw,de OR "Imagings, Ultrasound":ti,ab,kw,de OR "Echotomography":ti,ab,kw,de OR "Ultrasonic Imaging":ti,ab,kw,de OR "Imaging, Ultrasonic":ti,ab,kw,de OR "Sonography, Medical":ti,ab,kw,de OR "Medical Sonography":ti,ab,kw,de OR "Ultrasonographic Imaging":ti,ab,kw,de OR "Imaging, Ultrasonographic":ti,ab,kw,de OR "Imagings, Ultrasonographic":ti,ab,kw,de OR "Ultrasonographic Imagings":ti,ab,kw,de OR "Echography":ti,ab,kw,de OR "Diagnosis, Ultrasonic":ti,ab,kw,de OR "Diagnoses, Ultrasonic":ti,ab,kw,de OR "Ultrasonic Diagnoses":ti,ab,kw,de OR "Ultrasonic Diagnosis":ti,ab,kw,de OR "Echotomography, Computer":ti,ab,kw,de OR "Computer Echotomography":ti,ab,kw,de OR "Tomography, Ultrasonic":ti,ab,kw,de OR "Ultrasonic Tomography":ti,ab,kw,de OR "diagnostic ultrasonic examination":ti,ab,kw,de OR "diagnostic ultrasonic imaging":ti,ab,kw,de OR "diagnostic ultrasonic method":ti,ab,kw,de OR "doptone":ti,ab,kw,de OR "duplex echography":ti,ab,kw,de OR "echogram":ti,ab,kw,de OR "echographic evaluation":ti,ab,kw,de OR "echoscopy":ti,ab,kw,de OR "echosound":ti,ab,kw,de OR "high resolution echography":ti,ab,kw,de OR "scanning, ultrasonic":ti,ab,kw,de OR "sonogram":ti,ab,kw,de OR "sonographic examination":ti,ab,kw,de OR "sonographic screening":ti,ab,kw,de OR "sonography":ti,ab,kw,de OR "ultrasonic detection":ti,ab,kw,de OR "ultrasonic echo":ti,ab,kw,de OR "ultrasonic examination":ti,ab,kw,de OR "ultrasonic scanning":ti,ab,kw,de OR "ultrasonic scintillation":ti,ab,kw,de OR "ultrasonogram":ti,ab,kw,de OR "ultrasonographic examination":ti,ab,kw,de OR "ultrasonographic screening":ti,ab,kw,de OR "ultrasound diagnosis":ti,ab,kw,de OR "ultrasound scanning":ti,ab,kw,de |
| #9  | "biopsy"/exp                                                                                                                                                                                                                                                                                                                                                                                                                                                                                                                                                                                                                                                                                                                                                                                                                                                                                                                                                                                                                                                                                                                                                                                                                                                                                                                                                                                                                                                                                                                                                                                                                                                                                                                                                                                                                                                                                                                                                                                                                 |
| #10 | "Biopsy":ti,ab,kw,de OR "Biopsies":ti,ab,kw,de OR "bioptic diagnosis":ti,ab,kw,de OR "bioptical diagnosis":ti,ab,kw,de OR "rebiopsy":ti,ab,kw,de                                                                                                                                                                                                                                                                                                                                                                                                                                                                                                                                                                                                                                                                                                                                                                                                                                                                                                                                                                                                                                                                                                                                                                                                                                                                                                                                                                                                                                                                                                                                                                                                                                                                                                                                                                                                                                                                             |
| #11 | "fine needle aspiration biopsy"/exp                                                                                                                                                                                                                                                                                                                                                                                                                                                                                                                                                                                                                                                                                                                                                                                                                                                                                                                                                                                                                                                                                                                                                                                                                                                                                                                                                                                                                                                                                                                                                                                                                                                                                                                                                                                                                                                                                                                                                                                          |
| #12 | "Biopsy, Fine-Needle":ti,ab,kw,de OR "Biopsies, Fine-Needle":ti,ab,kw,de OR "Biopsy, Fine Needle":ti,ab,kw,de OR "Fine-Needle Biopsies":ti,ab,kw,de OR "Fine-Needle Biopsy":ti,ab,kw,de OR "Fine Needle Biopsy":ti,ab,kw,de OR "Biopsies, Fine Needle":ti,ab,kw,de OR "Fine Needle Biopsies":ti,ab,kw,de OR "Needle Biopsies, Fine":ti,ab,kw,de OR "Needle Biopsy, Fine":ti,ab,kw,de OR "Aspiration Biopsy, Fine-Needle":ti,ab,kw,de OR "Aspiration Biopsies, Fine-Needle":ti,ab,kw,de OR "Aspiration Biopsy, Fine Needle":ti,ab,kw,de OR "Biopsies, Fine-Needle Aspiration":ti,ab,kw,de OR "Biopsy, Fine-Needle Aspiration":ti,ab,kw,de OR "Fine-Needle Aspiration Biopsies":ti,ab,kw,de OR "Fine-Needle Aspiration Biopsy":ti,ab,kw,de OR "Fine-Needle Aspiration":ti,ab,kw,de OR "Aspiration, Fine-Needle":ti,ab,kw,de OR "Aspirations, Fine-Needle":ti,ab,kw,de OR "Fine Needle Aspiration":ti,ab,kw,de OR "Fine-Needle Aspirations":ti,ab,kw,de OR "fine needle aspiration biopsy":ti,ab,kw,de OR "fine core needle biopsy":ti,ab,kw,de OR "fine needle aspiration cytology":ti,ab,kw,de OR "fine needle aspirations":ti,ab,kw,de OR "FNA (fine needle aspiration)":ti,ab,kw,de OR "FNAB (fine needle aspiration biopsy)":ti,ab,kw,de OR "FNAC (fine needle aspiration cytology)":ti,ab,kw,de OR "needle aspiration":ti,ab,kw,de                                                                                                                                                                                                                                                                                                                                                                                                                                                                                                                                                                                                                                                                                        |
| #13 | #7 OR #8 OR #9 OR #10 OR #11 OR #12                                                                                                                                                                                                                                                                                                                                                                                                                                                                                                                                                                                                                                                                                                                                                                                                                                                                                                                                                                                                                                                                                                                                                                                                                                                                                                                                                                                                                                                                                                                                                                                                                                                                                                                                                                                                                                                                                                                                                                                          |
| #14 | "risk assessment"/exp                                                                                                                                                                                                                                                                                                                                                                                                                                                                                                                                                                                                                                                                                                                                                                                                                                                                                                                                                                                                                                                                                                                                                                                                                                                                                                                                                                                                                                                                                                                                                                                                                                                                                                                                                                                                                                                                                                                                                                                                        |

|  |     |                                                                                                                                                                                                                                                                                                                                                                                                                                                                                                                                                                                                                                                                                                                                                                                                                                                                                                                                                                      |
|--|-----|----------------------------------------------------------------------------------------------------------------------------------------------------------------------------------------------------------------------------------------------------------------------------------------------------------------------------------------------------------------------------------------------------------------------------------------------------------------------------------------------------------------------------------------------------------------------------------------------------------------------------------------------------------------------------------------------------------------------------------------------------------------------------------------------------------------------------------------------------------------------------------------------------------------------------------------------------------------------|
|  | #15 | "Risk Assessment":ti,ab,kw,de OR "Risk Assessments":ti,ab,kw,de OR "Health Risk Assessment":ti,ab,kw,de OR "Assessment, Health Risk":ti,ab,kw,de OR "Health Risk Assessments":ti,ab,kw,de OR "Risk Assessment, Health":ti,ab,kw,de OR "Assessment, Risk":ti,ab,kw,de OR "Risks and Benefits":ti,ab,kw,de OR "Benefits and Risks":ti,ab,kw,de OR "Risk Analysis":ti,ab,kw,de OR "Analysis, Risk":ti,ab,kw,de OR "Risk Analyses":ti,ab,kw,de OR "Benefit-Risk Assessment":ti,ab,kw,de OR "Assessment, Benefit-Risk":ti,ab,kw,de OR "Benefit Risk Assessment":ti,ab,kw,de OR "Benefit-Risk Assessments":ti,ab,kw,de OR "Risk-Benefit Assessment":ti,ab,kw,de OR "Assessment, Risk-Benefit":ti,ab,kw,de OR "Risk Benefit Assessment":ti,ab,kw,de OR "Risk-Benefit Assessments":ti,ab,kw,de OR "risk stratification":ti,ab,kw,de OR "assessment, safety":ti,ab,kw,de OR "risk adjustment":ti,ab,kw,de OR "risk evaluation":ti,ab,kw,de OR "safety assessment":ti,ab,kw,de |
|  | #16 | "Korean Thyroid Association":ti,ab,kw,de OR "Korean Society of Thyroid Radiology":ti,ab,kw,de OR "American Thyroid Association":ti,ab,kw,de OR "American College of Radiology":ti,ab,kw,de OR "European Thyroid Association":ti,ab,kw,de OR "Society of Radiologists":ti,ab,kw,de OR "KTA":ti,ab,kw,de OR "KSThR":ti,ab,kw,de OR "ATA":ti,ab,kw,de OR "ACR":ti,ab,kw,de OR "ETA":ti,ab,kw,de OR "SRU":ti,ab,kw,de OR "thyroid imaging reporting and data system":ti,ab,kw,de OR "TIRADS":ti,ab,kw,de OR "TI-RADS":ti,ab,kw,de OR "Kwak-TIRADS":ti,ab,kw,de OR "K-TIRADS":ti,ab,kw,de OR "ACR-TIRADS":ti,ab,kw,de OR "EU-TIRADS":ti,ab,kw,de                                                                                                                                                                                                                                                                                                                          |
|  | #17 | #14 OR #15 OR #16                                                                                                                                                                                                                                                                                                                                                                                                                                                                                                                                                                                                                                                                                                                                                                                                                                                                                                                                                    |
|  | #18 | #13 AND #17                                                                                                                                                                                                                                                                                                                                                                                                                                                                                                                                                                                                                                                                                                                                                                                                                                                                                                                                                          |
|  | #19 | #6 AND #18                                                                                                                                                                                                                                                                                                                                                                                                                                                                                                                                                                                                                                                                                                                                                                                                                                                                                                                                                           |
|  | #20 | #19 NOT ("animal"/de NOT ("animal"/de AND "human"/exp))                                                                                                                                                                                                                                                                                                                                                                                                                                                                                                                                                                                                                                                                                                                                                                                                                                                                                                              |

| Database         | Search | Search terms                                                                                                                                                                                                                                                                                                                                                                                                                                                                                                                                                                                                                                                                                                                                                                                                                                                                                                                                                                                                                                                                                                                                                                                                                                                        |
|------------------|--------|---------------------------------------------------------------------------------------------------------------------------------------------------------------------------------------------------------------------------------------------------------------------------------------------------------------------------------------------------------------------------------------------------------------------------------------------------------------------------------------------------------------------------------------------------------------------------------------------------------------------------------------------------------------------------------------------------------------------------------------------------------------------------------------------------------------------------------------------------------------------------------------------------------------------------------------------------------------------------------------------------------------------------------------------------------------------------------------------------------------------------------------------------------------------------------------------------------------------------------------------------------------------|
| Cochrane Library | #1     | [mh "Thyroid Neoplasms"]                                                                                                                                                                                                                                                                                                                                                                                                                                                                                                                                                                                                                                                                                                                                                                                                                                                                                                                                                                                                                                                                                                                                                                                                                                            |
|                  | #2     | "Thyroid Neoplasms":ti,ab,kw OR "Neoplasm, Thyroid":ti,ab,kw OR "Thyroid Neoplasm":ti,ab,kw OR "Neoplasms, Thyroid":ti,ab,kw OR "Thyroid Carcinoma":ti,ab,kw OR "Carcinoma, Thyroid":ti,ab,kw OR "Carcinomas, Thyroid":ti,ab,kw OR "Thyroid Carcinomas":ti,ab,kw OR "Cancer of Thyroid":ti,ab,kw OR "Thyroid Cancers":ti,ab,kw OR "Thyroid Cancer":ti,ab,kw OR "Cancer, Thyroid":ti,ab,kw OR "Cancers, Thyroid":ti,ab,kw OR "Cancer of the Thyroid":ti,ab,kw OR "Thyroid Adenoma":ti,ab,kw OR "Adenoma, Thyroid":ti,ab,kw OR "Adenomas, Thyroid":ti,ab,kw OR "Thyroid Adenomas":ti,ab,kw OR "thyroid tumor":ti,ab,kw OR "neoplasm of thyroid gland":ti,ab,kw OR "neoplastic thyroid":ti,ab,kw OR "neoplastic thyroid gland":ti,ab,kw OR "thyroid gland neoplasia":ti,ab,kw OR "thyroid gland neoplasm":ti,ab,kw OR "thyroid gland tumor":ti,ab,kw OR "thyroid gland tumour":ti,ab,kw OR "thyroid neoplasia":ti,ab,kw OR "thyroid tumorigenesis":ti,ab,kw OR "thyroid tumour":ti,ab,kw OR "thyroidal tumor":ti,ab,kw OR "thyroidal tumour":ti,ab,kw OR "tumor of thyroid":ti,ab,kw OR "tumor of thyroid gland":ti,ab,kw OR "tumor, thyroid gland":ti,ab,kw OR "tumour of thyroid":ti,ab,kw OR "tumour of thyroid gland":ti,ab,kw OR "tumour, thyroid gland":ti,ab,kw |
|                  | #3     | [mh "Thyroid Nodule"]                                                                                                                                                                                                                                                                                                                                                                                                                                                                                                                                                                                                                                                                                                                                                                                                                                                                                                                                                                                                                                                                                                                                                                                                                                               |
|                  | #4     | "Thyroid Nodule":ti,ab,kw OR "Nodule, Thyroid":ti,ab,kw OR "Nodules, Thyroid":ti,ab,kw OR "Thyroid Nodules":ti,ab,kw OR "colloid nodule (thyroid)":ti,ab,kw OR "colloidal nodule (thyroid)":ti,ab,kw OR "nodule of the thyroid gland":ti,ab,kw OR "nodule of thyroid gland":ti,ab,kw OR "nodule, thyroid gland":ti,ab,kw OR "thyroid colloid nodule":ti,ab,kw OR "thyroid colloidal nodule":ti,ab,kw OR "thyroid gland nodule":ti,ab,kw OR "thyroid solitary nodule":ti,ab,kw OR "thyroidal gland nodule":ti,ab,kw OR "thyroidal nodule":ti,ab,kw OR "thyroideal nodule":ti,ab,kw                                                                                                                                                                                                                                                                                                                                                                                                                                                                                                                                                                                                                                                                                   |
|                  | #5     | "thyroid mass":ti,ab,kw                                                                                                                                                                                                                                                                                                                                                                                                                                                                                                                                                                                                                                                                                                                                                                                                                                                                                                                                                                                                                                                                                                                                                                                                                                             |
|                  | #6     | #1 OR #2 OR #3 OR #4 OR #5                                                                                                                                                                                                                                                                                                                                                                                                                                                                                                                                                                                                                                                                                                                                                                                                                                                                                                                                                                                                                                                                                                                                                                                                                                          |
|                  | #7     | [mh "Ultrasonography"]                                                                                                                                                                                                                                                                                                                                                                                                                                                                                                                                                                                                                                                                                                                                                                                                                                                                                                                                                                                                                                                                                                                                                                                                                                              |

|     |                                                                                                                                                                                                                                                                                                                                                                                                                                                                                                                                                                                                                                                                                                                                                                                                                                                                                                                                                                                                                                                                                                                                                                                                                                                                                                                                                                                                                                                                                                                                                                                                                                                                                                                                                                                                                                                                  |
|-----|------------------------------------------------------------------------------------------------------------------------------------------------------------------------------------------------------------------------------------------------------------------------------------------------------------------------------------------------------------------------------------------------------------------------------------------------------------------------------------------------------------------------------------------------------------------------------------------------------------------------------------------------------------------------------------------------------------------------------------------------------------------------------------------------------------------------------------------------------------------------------------------------------------------------------------------------------------------------------------------------------------------------------------------------------------------------------------------------------------------------------------------------------------------------------------------------------------------------------------------------------------------------------------------------------------------------------------------------------------------------------------------------------------------------------------------------------------------------------------------------------------------------------------------------------------------------------------------------------------------------------------------------------------------------------------------------------------------------------------------------------------------------------------------------------------------------------------------------------------------|
| #8  | "ultrasound":ti,ab,kw OR "Ultrasonography":ti,ab,kw OR "Diagnostic Ultrasound":ti,ab,kw OR "Diagnostic Ultrasounds":ti,ab,kw OR "Ultrasound, Diagnostic":ti,ab,kw OR "Ultrasounds, Diagnostic":ti,ab,kw OR "Ultrasound Imaging":ti,ab,kw OR "Imaging, Ultrasound":ti,ab,kw OR "Imagings, Ultrasound":ti,ab,kw OR "Echotomography":ti,ab,kw OR "Ultrasonic Imaging":ti,ab,kw OR "Imaging, Ultrasonic":ti,ab,kw OR "Sonography, Medical":ti,ab,kw OR "Medical Sonography":ti,ab,kw OR "Ultrasonographic Imaging":ti,ab,kw OR "Imaging, Ultrasonographic":ti,ab,kw OR "Imagings, Ultrasonographic":ti,ab,kw OR "Ultrasonographic Imagings":ti,ab,kw OR "Echography":ti,ab,kw OR "Diagnosis, Ultrasonic":ti,ab,kw OR "Diagnoses, Ultrasonic":ti,ab,kw OR "Ultrasonic Diagnoses":ti,ab,kw OR "Ultrasonic Diagnosis":ti,ab,kw OR "Echotomography, Computer":ti,ab,kw OR "Computer Echotomography":ti,ab,kw OR "Tomography, Ultrasonic":ti,ab,kw OR "Ultrasonic Tomography":ti,ab,kw OR "diagnostic ultrasonic examination":ti,ab,kw OR "diagnostic ultrasonic imaging":ti,ab,kw OR "diagnostic ultrasonic method":ti,ab,kw OR "doptone":ti,ab,kw OR "duplex echography":ti,ab,kw OR "echogram":ti,ab,kw OR "echographic evaluation":ti,ab,kw OR "echoscopy":ti,ab,kw OR "echosound":ti,ab,kw OR "high resolution echography":ti,ab,kw OR "scanning, ultrasonic":ti,ab,kw OR "sonogram":ti,ab,kw OR "sonographic examination":ti,ab,kw OR "sonographic screening":ti,ab,kw OR "sonography":ti,ab,kw OR "ultrasonic detection":ti,ab,kw OR "ultrasonic echo":ti,ab,kw OR "ultrasonic examination":ti,ab,kw OR "ultrasonic scanning":ti,ab,kw OR "ultrasonic scintillation":ti,ab,kw OR "ultrasonogram":ti,ab,kw OR "ultrasonographic examination":ti,ab,kw OR "ultrasonographic screening":ti,ab,kw OR "ultrasound diagnosis":ti,ab,kw OR "ultrasound scanning":ti,ab,kw |
| #9  | [mh "Biopsy"]                                                                                                                                                                                                                                                                                                                                                                                                                                                                                                                                                                                                                                                                                                                                                                                                                                                                                                                                                                                                                                                                                                                                                                                                                                                                                                                                                                                                                                                                                                                                                                                                                                                                                                                                                                                                                                                    |
| #10 | "Biopsy":ti,ab,kw OR "Biopsies":ti,ab,kw OR "bioptic diagnosis":ti,ab,kw OR "bioptical diagnosis":ti,ab,kw OR "rebiopsy":ti,ab,kw                                                                                                                                                                                                                                                                                                                                                                                                                                                                                                                                                                                                                                                                                                                                                                                                                                                                                                                                                                                                                                                                                                                                                                                                                                                                                                                                                                                                                                                                                                                                                                                                                                                                                                                                |
| #11 | [mh "Biopsy, Fine-Needle"]                                                                                                                                                                                                                                                                                                                                                                                                                                                                                                                                                                                                                                                                                                                                                                                                                                                                                                                                                                                                                                                                                                                                                                                                                                                                                                                                                                                                                                                                                                                                                                                                                                                                                                                                                                                                                                       |
| #12 | "Biopsy, Fine-Needle":ti,ab,kw OR "Biopsies, Fine-Needle":ti,ab,kw OR "Biopsy, Fine Needle":ti,ab,kw OR "Fine-Needle Biopsies":ti,ab,kw OR "Fine-Needle Biopsy":ti,ab,kw OR "Fine Needle Biopsy":ti,ab,kw OR "Biopsies, Fine Needle":ti,ab,kw OR "Fine Needle Biopsies":ti,ab,kw OR "Needle Biopsies, Fine":ti,ab,kw OR "Needle Biopsy, Fine":ti,ab,kw OR "Aspiration Biopsy, Fine-Needle":ti,ab,kw OR "Aspiration Biopsies, Fine-Needle":ti,ab,kw OR "Aspiration Biopsy, Fine Needle":ti,ab,kw OR "Biopsies, Fine-Needle Aspiration":ti,ab,kw OR "Biopsy, Fine-Needle Aspiration":ti,ab,kw OR "Fine-Needle Aspiration Biopsies":ti,ab,kw OR "Fine-Needle Aspiration Biopsy":ti,ab,kw OR "Fine-Needle Aspiration":ti,ab,kw OR "Aspiration, Fine-Needle":ti,ab,kw OR "Aspirations, Fine-Needle":ti,ab,kw OR "Fine Needle Aspiration":ti,ab,kw OR "Fine-Needle Aspirations":ti,ab,kw OR "fine needle aspiration biopsy":ti,ab,kw OR "fine core needle biopsy":ti,ab,kw OR "fine needle aspiration cytology":ti,ab,kw OR "fine needle aspirations":ti,ab,kw OR "FNA (fine needle aspiration)":ti,ab,kw OR "FNAB (fine needle aspiration biopsy)":ti,ab,kw OR "FNAC (fine needle aspiration cytology)":ti,ab,kw OR "needle aspiration":ti,ab,kw                                                                                                                                                                                                                                                                                                                                                                                                                                                                                                                                                                                                                      |
| #13 | #7 OR #8 OR #9 OR #10 OR #11 OR #12                                                                                                                                                                                                                                                                                                                                                                                                                                                                                                                                                                                                                                                                                                                                                                                                                                                                                                                                                                                                                                                                                                                                                                                                                                                                                                                                                                                                                                                                                                                                                                                                                                                                                                                                                                                                                              |
| #14 | [mh "Risk Assessment"]                                                                                                                                                                                                                                                                                                                                                                                                                                                                                                                                                                                                                                                                                                                                                                                                                                                                                                                                                                                                                                                                                                                                                                                                                                                                                                                                                                                                                                                                                                                                                                                                                                                                                                                                                                                                                                           |
| #15 | "Risk Assessment":ti,ab,kw OR "Risk Assessments":ti,ab,kw OR "Health Risk Assessment":ti,ab,kw OR "Assessment, Health Risk":ti,ab,kw OR "Health Risk Assessments":ti,ab,kw OR "Risk Assessment, Health":ti,ab,kw OR "Assessment, Risk":ti,ab,kw OR "Risks and Benefits":ti,ab,kw OR "Benefits and Risks":ti,ab,kw OR "Risk Analysis":ti,ab,kw OR "Analysis, Risk":ti,ab,kw OR "Risk Analyses":ti,ab,kw OR "Benefit-Risk Assessment":ti,ab,kw OR "Assessment, Benefit-Risk":ti,ab,kw OR "Benefit Risk Assessment":ti,ab,kw OR "Benefit-Risk Assessments":ti,ab,kw OR "Risk-Benefit Assessment":ti,ab,kw OR "Assessment, Risk-Benefit":ti,ab,kw OR "Risk Benefit Assessment":ti,ab,kw OR "Risk-Benefit Assessments":ti,ab,kw OR "risk stratification":ti,ab,kw OR "assessment, safety":ti,ab,kw OR "risk adjustment":ti,ab,kw OR "risk evaluation":ti,ab,kw OR "safety assessment":ti,ab,kw                                                                                                                                                                                                                                                                                                                                                                                                                                                                                                                                                                                                                                                                                                                                                                                                                                                                                                                                                                        |
| #16 | "Korean Thyroid Association":ti,ab,kw OR "Korean Society of Thyroid Radiology":ti,ab,kw OR "American Thyroid Association":ti,ab,kw OR "American College of Radiology":ti,ab,kw OR "European Thyroid Association":ti,ab,kw OR "Society of Radiologists":ti,ab,kw OR "KTA":ti,ab,kw OR "KSThR":ti,ab,kw OR "ATA":ti,ab,kw OR "ACR":ti,ab,kw OR "ETA":ti,ab,kw OR "SRU":ti,ab,kw OR "thyroid imaging reporting and data system":ti,ab,kw OR "TIRADS":ti,ab,kw OR "TI-RADS":ti,ab,kw OR "Kwak-TIRADS":ti,ab,kw OR "K-TIRADS":ti,ab,kw OR "ACR-TIRADS":ti,ab,kw OR "EU-TIRADS":ti,ab,kw                                                                                                                                                                                                                                                                                                                                                                                                                                                                                                                                                                                                                                                                                                                                                                                                                                                                                                                                                                                                                                                                                                                                                                                                                                                                               |
| #17 | #14 OR #15 OR #16                                                                                                                                                                                                                                                                                                                                                                                                                                                                                                                                                                                                                                                                                                                                                                                                                                                                                                                                                                                                                                                                                                                                                                                                                                                                                                                                                                                                                                                                                                                                                                                                                                                                                                                                                                                                                                                |
| #18 | #13 AND #17                                                                                                                                                                                                                                                                                                                                                                                                                                                                                                                                                                                                                                                                                                                                                                                                                                                                                                                                                                                                                                                                                                                                                                                                                                                                                                                                                                                                                                                                                                                                                                                                                                                                                                                                                                                                                                                      |

|  |     |            |
|--|-----|------------|
|  | #19 | #6 AND #18 |
|--|-----|------------|

| DB             | Search | Search terms                                                                                                                                                                                                                                                                                                                                                                                                                                                                                                                                                                                                                                                                                                                                                                                                                                                                                                                                                                                                                                                                                                                                                                                                                                                                                                                                                                      |
|----------------|--------|-----------------------------------------------------------------------------------------------------------------------------------------------------------------------------------------------------------------------------------------------------------------------------------------------------------------------------------------------------------------------------------------------------------------------------------------------------------------------------------------------------------------------------------------------------------------------------------------------------------------------------------------------------------------------------------------------------------------------------------------------------------------------------------------------------------------------------------------------------------------------------------------------------------------------------------------------------------------------------------------------------------------------------------------------------------------------------------------------------------------------------------------------------------------------------------------------------------------------------------------------------------------------------------------------------------------------------------------------------------------------------------|
| Web of Science | #1     | TS=("Thyroid Neoplasms" OR "Neoplasm, Thyroid" OR "Thyroid Neoplasm" OR "Neoplasms, Thyroid" OR "Thyroid Carcinoma" OR "Carcinoma, Thyroid" OR "Carcinomas, Thyroid" OR "Thyroid Carcinomas" OR "Cancer of Thyroid" OR "Thyroid Cancers" OR "Thyroid Cancer" OR "Cancer, Thyroid" OR "Cancers, Thyroid" OR "Cancer of the Thyroid" OR "Thyroid Adenoma" OR "Adenoma, Thyroid" OR "Adenomas, Thyroid" OR "Thyroid Adenomas" OR "thyroid tumor" OR "neoplasm of thyroid gland" OR "neoplastic thyroid" OR "neoplastic thyroid gland" OR "thyroid gland neoplasia" OR "thyroid gland neoplasm" OR "thyroid gland tumor" OR "thyroid gland tumour" OR "thyroid neoplasia" OR "thyroid tumorigenesis" OR "thyroid tumour" OR "thyroidal tumor" OR "thyroidal tumour" OR "tumor of thyroid" OR "tumor of thyroid gland" OR "tumor, thyroid gland" OR "tumour of thyroid" OR "tumour of thyroid gland" OR "tumour, thyroid gland")                                                                                                                                                                                                                                                                                                                                                                                                                                                       |
|                | #2     | TS=("Thyroid Nodule" OR "Nodule, Thyroid" OR "Nodules, Thyroid" OR "Thyroid Nodules" OR "colloid nodule (thyroid)" OR "colloidal nodule (thyroid)" OR "nodule of the thyroid gland" OR "nodule of thyroid gland" OR "nodule, thyroid gland" OR "thyroid colloid nodule" OR "thyroid colloidal nodule" OR "thyroid gland nodule" OR "thyroid solitary nodule" OR "thyroidal gland nodule" OR "thyroidal nodule" OR "thyroideal nodule")                                                                                                                                                                                                                                                                                                                                                                                                                                                                                                                                                                                                                                                                                                                                                                                                                                                                                                                                            |
|                | #3     | TS=("thyroid mass")                                                                                                                                                                                                                                                                                                                                                                                                                                                                                                                                                                                                                                                                                                                                                                                                                                                                                                                                                                                                                                                                                                                                                                                                                                                                                                                                                               |
|                | #4     | #1 OR #2 OR #3                                                                                                                                                                                                                                                                                                                                                                                                                                                                                                                                                                                                                                                                                                                                                                                                                                                                                                                                                                                                                                                                                                                                                                                                                                                                                                                                                                    |
|                | #5     | TS=("ultrasound" OR "Ultrasonography" OR "Diagnostic Ultrasound" OR "Diagnostic Ultrasounds" OR "Ultrasound, Diagnostic" OR "Ultrasounds, Diagnostic" OR "Ultrasound Imaging" OR "Imaging, Ultrasound" OR "Imagings, Ultrasound" OR "Echotomography" OR "Ultrasonic Imaging" OR "Imaging, Ultrasonic" OR "Sonography, Medical" OR "Medical Sonography" OR "Ultrasonographic Imaging" OR "Imaging, Ultrasonographic" OR "Imagings, Ultrasonographic" OR "Ultrasonographic Imagings" OR "Echography" OR "Diagnosis, Ultrasonic" OR "Diagnoses, Ultrasonic" OR "Ultrasonic Diagnoses" OR "Ultrasonic Diagnosis" OR "Echotomography, Computer" OR "Computer Echotomography" OR "Tomography, Ultrasonic" OR "Ultrasonic Tomography" OR "diagnostic ultrasonic examination" OR "diagnostic ultrasonic imaging" OR "diagnostic ultrasonic method" OR "doptone" OR "duplex echography" OR "echogram" OR "echographic evaluation" OR "echoscopy" OR "echosound" OR "high resolution echography" OR "scanning, ultrasonic" OR "sonogram" OR "sonographic examination" OR "sonographic screening" OR "sonography" OR "ultrasonic detection" OR "ultrasonic echo" OR "ultrasonic examination" OR "ultrasonic scanning" OR "ultrasonic scintillation" OR "ultrasonogram" OR "ultrasonographic examination" OR "ultrasonographic screening" OR "ultrasound diagnosis" OR "ultrasound scanning") |
|                | #6     | TS=("Biopsy" OR "Biopsies" OR "bioptic diagnosis" OR "bioptical diagnosis" OR "rebiopsy")                                                                                                                                                                                                                                                                                                                                                                                                                                                                                                                                                                                                                                                                                                                                                                                                                                                                                                                                                                                                                                                                                                                                                                                                                                                                                         |
|                | #7     | TS=("Biopsy, Fine-Needle" OR "Biopsies, Fine-Needle" OR "Biopsy, Fine Needle" OR "Fine-Needle Biopsies" OR "Fine-Needle Biopsy" OR "Fine Needle Biopsy" OR "Biopsies, Fine Needle" OR "Fine Needle Biopsies" OR "Needle Biopsies, Fine" OR "Needle Biopsy, Fine" OR "Aspiration Biopsy, Fine-Needle" OR "Aspiration Biopsies, Fine-Needle" OR "Aspiration Biopsy, Fine Needle" OR "Biopsies, Fine-Needle Aspiration" OR "Biopsy, Fine-Needle Aspiration" OR "Fine-Needle Aspiration Biopsies" OR "Fine-Needle Aspiration Biopsy" OR "Fine-Needle Aspiration" OR "Aspiration, Fine-Needle" OR "Aspirations, Fine-Needle" OR "Fine Needle Aspiration" OR "Fine-Needle Aspirations" OR "fine needle aspiration biopsy" OR "fine core needle biopsy" OR "fine needle aspiration cytology" OR "fine needle aspirations" OR "FNA (fine needle aspiration)" OR "FNAB (fine needle aspiration biopsy)" OR "FNAC (fine needle aspiration cytology)" OR "needle aspiration")                                                                                                                                                                                                                                                                                                                                                                                                                |
|                | #8     | #5 OR #6 OR #7                                                                                                                                                                                                                                                                                                                                                                                                                                                                                                                                                                                                                                                                                                                                                                                                                                                                                                                                                                                                                                                                                                                                                                                                                                                                                                                                                                    |
|                | #9     | TS=("Risk Assessment" OR "Risk Assessments" OR "Health Risk Assessment" OR "Assessment, Health Risk" OR "Health Risk Assessments" OR "Risk Assessment, Health" OR "Assessment, Risk" OR "Risks and Benefits" OR "Benefits and Risks" OR "Risk Analysis" OR "Analysis, Risk" OR "Risk Analyses" OR "Benefit-Risk Assessment" OR "Assessment, Benefit-Risk" OR "Benefit Risk Assessment" OR "Benefit-Risk Assessments" OR "Risk-Benefit Assessment" OR "Assessment, Risk-Benefit" OR "Risk Benefit Assessment" OR "Risk-Benefit Assessments" OR "risk stratification" OR "assessment, safety" OR "risk adjustment" OR "risk evaluation" OR "safety assessment")                                                                                                                                                                                                                                                                                                                                                                                                                                                                                                                                                                                                                                                                                                                     |

|  |     |                                                                                                                                                                                                                                                                                                                                                                                                                                                                     |
|--|-----|---------------------------------------------------------------------------------------------------------------------------------------------------------------------------------------------------------------------------------------------------------------------------------------------------------------------------------------------------------------------------------------------------------------------------------------------------------------------|
|  | #10 | TS=("Korean Thyroid Association" OR "Korean Society of Thyroid Radiology" OR "American Thyroid Association" OR "American College of Radiology" OR "European Thyroid Association" OR "American Association of Clinical Endocrinologists" OR "Society of Radiologists" OR "KTA" OR "KSThR" OR "ATA" OR "ACR" OR "ETA" OR "SRU" OR "thyroid imaging reporting and data system" OR "TIRADS" OR "TI-RADS" OR "Kwak-TIRADS" OR "K-TIRADS" OR "ACR-TIRADS" OR "EU-TIRADS") |
|  | #11 | #9 OR #10                                                                                                                                                                                                                                                                                                                                                                                                                                                           |
|  | #12 | #8 AND #11                                                                                                                                                                                                                                                                                                                                                                                                                                                          |
|  | #13 | #4 AND #12                                                                                                                                                                                                                                                                                                                                                                                                                                                          |

| Database       | Search | Search terms                                                                                                                                                                                                                     |
|----------------|--------|----------------------------------------------------------------------------------------------------------------------------------------------------------------------------------------------------------------------------------|
| Google Scholar | #1     | "Thyroid Neoplasm" "Thyroid Neoplasms" "Thyroid Cancers" "Thyroid Cancer" "Thyroid Nodule" "Thyroid Nodules" "thyroid mass"                                                                                                      |
|                | #2     | "Ultrasonography" "ultrasound" "Biopsy" "Biopsies" "Fine-Needle"                                                                                                                                                                 |
|                | #3     | "Risk Assessment" "risk stratification" KTA KSThR ATA ACR ETA AACE ACE AME SRU TIRADS TI-RADS                                                                                                                                    |
|                | #4     | (Thyroid Neoplasm Thyroid Cancer Thyroid Nodule "thyroid mass") AND ((("Ultrasonography" "ultrasound" "Biopsy" "Biopsies" "Fine-Needle") AND ("Risk Assessment" "risk stratification" KTA KSThR ATA ACR ETA SRU TIRADS TI-RADS)) |

Supplementary Table S2. Study characteristics

| Study            | Year | Type                              | Patients Number | Age                        | Sex (F/M) | Nationality | Mean nodule's size            | Tumor size      | per specimen | Cutoff value             | Risk Stratification Systems     | Reference test                                                       |
|------------------|------|-----------------------------------|-----------------|----------------------------|-----------|-------------|-------------------------------|-----------------|--------------|--------------------------|---------------------------------|----------------------------------------------------------------------|
| Chng 2015        | 2015 | retrospective study               | 144             | 49.6 ± 15.7 yrs            | 110/34    | UK          | 3.2 ± 1.5 cm                  |                 | 144          | 4a                       | TIRADS (Kwak)                   | only cytology                                                        |
| Yoon 2015        | 2015 | Retrospective                     | 1241            | 50.8 yrs                   | NA        | Korea       | 18.8 ± 10.7 mm                | >1.0 cm         | 1293         | 4a                       | TIRADS (Kwak), ATA              | cytological and histological diagnoses                               |
| Zhang 2015       | 2015 | prospective study                 | 2921            | NA                         | NA        | China       | NA                            | all             | 3980         | 4a                       | TIRADS (Kwak)                   | cytological and histological diagnoses                               |
| Srinivas 2016    | 2016 | prospective study                 | 365             | 33.1 yrs (range: 18-68)    | 343/22    | India       | 14.2 mm (range: 3-59)         |                 | 365          | 4a                       | TIRADS (Kwak)                   | cytologically or pathologically confirm                              |
| Ha 2017          | 2017 | Prospective multicenter study     | 750             | 49.2 yrs (range: 9-81)     | 594/156   | Korea       | 1.5 ± 1.1 cm (0.5-10.0 cm)    | > 5 mm          | 902          | Low suspicion            | TIRADS (Korea)                  | cytologically or pathologically confirm                              |
| Mao 2017         | 2017 | retrospective study of            | 121             | 54±13 yrs (range: 25-76)   | 103/18    | China       | 9.1±4.6 mm (5-25)             |                 | 121          | 4a                       | TIRADS (Kwak)                   | cytologically or pathologically confirm                              |
| Ting 2017        | 2017 | Retrospective                     | 734             | 46.8 ± 13.1 yrs            | 578/156   | China       | 17.7 ± 12.8mm                 | <10 mm          | 962          | High suspicion           | ATA                             | cytologically or pathologically confirm                              |
| Trimboli 2017    | 2017 | Retrospective                     | 173             | 50 ± 14 yrs                | 127/46    | Switzerland | 2.5 cm                        | >1.0 cm (n=157) | 173          | Low suspicion            | ATA                             | postoperative histology                                              |
| Yoon 2017        | 2017 | retrospectively review            | 4585            | 46.7 ± 12.7 yrs            | 3836/749  | Korea       | 12.7 ± 2.6 mm                 | 1?2 cm          | 4696         | 4a                       | TIRADS (Kwak), ATA              | cytological and histological diagnoses                               |
| Bae 2018         | 2018 | Prospective study                 | 190             | 49.7 ± 11.3 (range: 20-83) | 183/55    | Korea       | 2.2 ± 1.2 cm (range: 1.0-6.0) | ≥ 10 mm         | 201          | Intermediate suspicion   | TIRADS (Korea)                  | cytologically or pathologically confirm                              |
| Chng 2018        | 2018 | Retrospective                     | 150             | 54.4 ± 12.4 yrs            | 120/30    | Singapore   | 3.1 ± 1.5 cm                  | > 1 cm          | 167          | 4a                       | TIRADS (Kwak)                   | Surgery                                                              |
| Chng 2018        | 2018 | Retrospective                     | 150             | 54.4 ± 12.4 yrs            | 120/30    | Singapore   | 3.1 ± 1.5 cm                  | > 1 cm          | 167          | Low suspicion            | ATA                             | surgery                                                              |
| de Macedo 2018   | 2018 | Retrospective                     | 178             | 59 yrs (range: 49-66)      | 167/11    | Brazil      | 24 mm (range 15-37)           | > 1 cm          | 195          | High suspicion           | ATA, EU TIRADS                  | cytopathologic results of the Bethesda system, and surgical findings |
| Ha 2018          | 2018 | Retrospective                     | 750             | 49.2 yrs (range: 9-81)     | 594/156   | Korea       | 1.5 ±1.1 cm                   | >5mm            | 902          | highly suspicious (TR5). | ACR TI-RADS                     | cytopathologic results of the Bethesda system, and surgical findings |
| Ha 2018          | 2018 | Retrospective                     | 750             | 49.2 yrs (range: 9-81)     | 594/156   | Korea       | 1.5 ±1.1 cm                   | >5mm            | 902          | High suspicion           | ATA, TIRADS (Korea)             | cytopathologic results of the Bethesda system, and surgical findings |
| Persichetti 2018 | 2018 | Prospective observational study   | 789             | 55 ± 14 yrs                | 608/181   | Italy       | 21.2 ± 13.4 mm                |                 | 1100         | High suspicion           | ATA                             | cytopathologic results of the Bethesda system, and surgical findings |
| Ahmadi 2019      | 2019 | retrospectively review            | 186             | 57 yrs (IQR: 44-68)        | 154/32    | USA         | 2.4 cm (IQR: 1.5-3.5)         |                 | 202          | highly suspicious (TR5). | ACR TI-RADS, ATA                | surgical pathology                                                   |
| Barbosa 2019     | 2019 | retrospective observational study | 139             | 49 ± 13 yrs                | 118/21    | Brazil      | 1.7 cm                        |                 | 140          | mildly suspicious (TR3)  | ACR TI-RADS, ATA                | cytopathologic results of the Bethesda system, and surgical findings |
| Gao 2019         | 2019 | retrospectively review            | 1758            | 48.5 ± 12.0 yrs            | 1788/756  | China       | 1.1 ± 0.7 cm                  |                 | 2544         | 4a                       | TIRADS (Kwak), ACR TI-RADS, ATA | surgical pathology                                                   |
| Gitto 2019       | 2019 | retrospectively review            | 62              | 60 ± 12 yrs                | 50/12     | Italy       | 18 ± 7 mm                     |                 | 62           | Intermediate suspicion   | TIRADS (Korea)                  | only cytology                                                        |



| n                        |      |                                           |      |                                |          |          |                                  |        |      |                             |                                             |                                                                                                              |
|--------------------------|------|-------------------------------------------|------|--------------------------------|----------|----------|----------------------------------|--------|------|-----------------------------|---------------------------------------------|--------------------------------------------------------------------------------------------------------------|
| Ha 2019                  | 2019 | retrospective study                       | 3190 | 53.4 ± 12.2 yrs                | 2517/673 | Korea    | 1.4 cm (range: 0.3-9.6)          |        | 3323 | mildly suspicious (TR3)     | ACR TI-RADS, ATA, TIRADS (Korea)            | cytological and histological diagnoses                                                                       |
| Ha 2019                  | 2019 | retrospective study                       | 2747 | 51.4 ± 14.4 yrs                | 532/2111 | Korea    | 14.4 mm (range: 2-96)            |        | 2747 | Intermediate suspicion      | ATA, TIRADS (Korea)                         | cytologically or pathologically confirm cytopathologic results of the Bethesda system, and surgical findings |
| Hong 2019                | 2019 | retrospectively review                    | 683  | 48.50 ± 11.78 yrs              | 568/115  | Korea    | 1.32 ± 1.02 cm                   |        | 683  | High suspicion              | ATA, TIRADS (Korea)                         |                                                                                                              |
| Li 2019                  | 2019 | Retrospective hospital-based cohort study | 93   | 55.21 ± 2.95 yrs               | 73/20    | China    | 1.72 ± 0.18 cm                   |        | 93   | 4a                          | TIRADS (Kwak), ATA                          | surgical pathology                                                                                           |
| Madsen Barbosa 2019      | 2019 | retrospective observational study         | 139  | 48.6 ± 13.3 yrs (25-77)        | 118/21   | Brazil   | NA                               |        | 140  | mildly suspicious (TR3)     | ACR TI-RADS, ATA                            | cytological and histological diagnoses                                                                       |
| Phuttharak 2019          | 2019 | retrospective study                       | 94   | 51.6 ± 13.08 yrs               | 7/87     | Thailand | 2.12 cm (range: 0.46-8.0)        |        | 108  | moderately suspicious (TR4) | ACR TI-RADS, EU TI-RADS                     | only cytology                                                                                                |
| Ruan 2019                | 2019 | retrospective study                       | 918  | 45.7 yrs (range: 14-78)        | 562/356  | China    | 14.5 ± 9.4 mm                    |        | 1001 | highly suspicious (TR5).    | ACR TI-RADS, ATA                            | cytopathologic results of the Bethesda system, and surgical findings                                         |
| Shen 2019                | 2019 | retrospectively review                    | 1568 | 48 ± 13 yrs                    | 1192/420 | China    | 13.59 ± 11.01 mm                 | >5mm   | 1612 | 4a                          | TIRADS (Kwak), ACR TI-RADS, ATA, EU TI-RADS | cytopathologic results of the Bethesda system, and surgical findings                                         |
| Wu 2019                  | 2019 | retrospectively review                    | 894  | NA                             | NA       | China    | NA                               |        | 1000 | highly suspicious (TR5).    | ACR TI-RADS, ATA                            | cytopathologic results of the Bethesda system, and surgical findings                                         |
| Wu 2019                  | 2019 | Prospective study                         | 29   | 47.6 ± 15.5 yrs                | NA       | China    | 25.8 ± 13.0 mm (range: 4-62)     |        | 43   | mildly suspicious (TR3)     | ACR TI-RADS                                 | surgical pathology                                                                                           |
| Xiang 2019               | 2019 | retrospective study                       | 505  | 48.9±2.2 yrs                   | 401/114  | China    | 1.78±1.42 cm (range: 0.16-7.1cm) | all    | 708  | High suspicion              | ATA, TIRADS (Korea)                         | surgical pathology                                                                                           |
| Xu 2019                  | 2019 | retrospective study                       | 2031 | 47.68 ± 13.39 yrs              | 1616/415 | China    | 16.63 ± 11.78 mm                 |        | 2031 | mildly suspicious (TR3)     | ACR TI-RADS, EU TI-RADS, TIRADS (Korea)     | cytologically or pathologically confirm                                                                      |
| Yoon 2019                | 2019 | retrospectively review                    | 1836 | 55.1 yrs                       | 1494/342 | Korea    | 19.4 ± 9.9 mm (range: 10-90)     | ≥ 1 cm | 2274 | mildly suspicious (TR3)     | ACR TI-RADS, EU TI-RADS, TIRADS (Korea)     | cytological and histological diagnoses                                                                       |
| Huang 2020               | 2020 | retrospectively review                    | 260  | 58 yrs (range: 46-69)          | 212/48   | USA      | 2.2 (IQR: 1.6-3.3)               |        | 361  | mildly suspicious (TR3)     | ACR TI-RADS, ATA                            | cytology diagnoses                                                                                           |
| Koc 2020                 | 2020 | retrospectively review                    | 460  | 52 yrs (range: 18-84)          | 375/85   | Turkey   | NA                               |        | 492  | mildly suspicious (TR3)     | ACR TI-RADS, ATA, EU TI-RADS                | histopathology                                                                                               |
| Peng 2020 (Junior)       | 2020 | Retrospective diagnostic study            | 230  | 44.8 ± 11.5 yrs                | 171/59   | China    | 15.6 ± 10.7 mm (range: 3.0-52.0) |        | 230  | mildly suspicious (TR3)     | ACR TI-RADS, ATA                            | cytologically or pathologically confirm                                                                      |
| Szczepanek-Parulska 2020 | 2020 | prospective study                         | 88   | 49.4 ± 15.5 yrs (range: 17-80) | 70/18    | Poland   | NA                               |        | 133  | Intermediate risk           | EU TI-RADS                                  | surgical pathology                                                                                           |
| Watkins 2020             | 2020 | retrospectively review                    | 212  | 58.5 ± 29 yrs                  | 161/61   | UK       | 19 ± 19.1 mm                     |        | 218  | mildly suspicious (TR3)     | ACR TI-RADS                                 | histopathology                                                                                               |
| Xiao 2020                | 2020 | Retrospective diagnostic study            | 792  | 48.25 ± 12.37 yrs              | 632/160  | China    | 0.9 cm (range: 0.5-1.9)          | all    | 1940 | 4a                          | TIRADS (Kwak), ACR TI-RADS                  | cytologically or pathologically confirm                                                                      |

|                          |      |                                    |      |                            |           |             |                                |          |      |                             |                                                                                         |                                         |
|--------------------------|------|------------------------------------|------|----------------------------|-----------|-------------|--------------------------------|----------|------|-----------------------------|-----------------------------------------------------------------------------------------|-----------------------------------------|
| Yang 2020                | 2020 | retrospectively review             | 92   | 51.1 yrs                   | 70/22     | USA         | 2.1 cm (range: 0.8-7.7)        |          | 92   | mildly suspicious (TR3)     | ACR TI-RADS, ATA, TIRADS (Korea)                                                        | surgical pathology                      |
| Yoo 2020                 | 2020 | retrospective observational study  | 382  | 47.4±12.6 yrs              | 297/85    | Korea       | 1.14 ± 0.82 cm                 |          | 382  | mildly suspicious (TR3)     | ACR TI-RADS, ATA, EU TI-RADS, TIRADS (Korea)                                            | cytologically or pathologically confirm |
| Yoon 2020                | 2020 | retrospective design               | 8364 | 50.1 ± 13.5 yrs            | 6598/1766 | Korea       | 22.0±12.1 mm (range: 10-113)   |          | 8657 | 4a                          | TIRADS (Kwak), ACR TI-RADS, ATA, EU TI-RADS, TIRADS (Korea)                             | cytologically or pathologically confirm |
| Zhang 2020               | 2020 | retrospective study                | 1271 | 51.7±12.5 yrs              | 986/285   | China       | 16.4±11.6 mm                   | all      | 1271 | 4a                          | TIRADS (Kwak), ACR TI-RADS, ATA, TIRADS (Korea)                                         | cytologically or pathologically confirm |
| Celletti 2021            | 2021 | prospective study                  | 128  | 54.3 yrs (range: 18-82)    | 89/39     | Italy       | NA                             | all      | 128  | Low suspicion               | TIRADS (Korea)                                                                          | cytologically or pathologically confirm |
| Chen 2021                | 2021 | retrospective study                | 125  | 56.7 yrs                   | 99/26     | Australia   | median: 2.3 cm (range: 0.1-13) |          | 146  | mildly suspicious (TR3)     | ACR TI-RADS, ATA, TIRADS (Korea)                                                        | cytologically or pathologically confirm |
| Chung 2021               | 2021 | retrospective study                | 5081 | 53.2 ± 12.7 yrs            | 4176/905  | Korea       | 2.1 ± 1.1 cm (range: 1-10)     | ≥ 1 cm   | 5708 | Low suspicion               | TIRADS (Korea)                                                                          | cytologically or pathologically confirm |
| da Silva 2021 (cytology) | 2021 | retrospectively review             | 314  | 51.56 ± 15.4 yrs           | NA        | Brazil      | 1.69 ± 1.32 cm                 |          | 473  | moderately suspicious (TR4) | ACR TI-RADS, EU TI-RADS                                                                 | cytologically or pathologically confirm |
| Ha 2021                  | 2021 | retrospectively multicenter review | 5081 | 53.2 yrs (range: 19-93)    | 4176/905  | Korea       | 20.7±10.8 mm (range: 10-100)   | ≥ 1.0 cm | 5708 | mildly suspicious (TR3)     | ACR TI-RADS, EU TI-RADS, TIRADS (Korea)                                                 | cytologically or pathologically confirm |
| Han 2021                 | 2021 | retrospectively multicenter review | 372  | 49.5 yrs (range: 8-81)     | 289/83    | Korea       | 17.8 mm (range: 10-73)         | ≥ 1.0 cm | 454  | mildly suspicious (TR3)     | ACR TI-RADS, TIRADS (Korea)                                                             | cytologically or pathologically confirm |
| Hekimsoy 2021            | 2021 | retrospective study                | 165  | 49.64±13.50 yrs            | 131/34    | Turkey      | 15.0 mm (range: 10-29.25)      |          | 251  | mildly suspicious (TR3)     | ACR TI-RADS, EU TI-RADS                                                                 | cytologically or pathologically confirm |
| Huh 2021                 | 2021 | retrospective study                | 1301 | 50.2 ± 13.6 yrs            | 1062/239  | Korea       | 23.2 ± 12.6 mm (range: 10-100) |          | 1384 | 4a                          | TIRADS (Kwak), ACR TI-RADS, ATA, EU TI-RADS                                             | cytologically or pathologically confirm |
| Kang 2021                | 2021 | retrospective study                | 160  | 51.2 ± 14.5 yrs            | 145/15    | Korea       | 1.7±1.1 cm                     |          | 200  | mildly suspicious (TR3)     | ACR TI-RADS, TIRADS (Korea)                                                             | cytologically or pathologically confirm |
| Na 2021                  | 2021 | retrospective study                | 3088 | median 56 yrs (IQR: 47-64) | 2497/591  | Korea       | 1.7 cm (range: 1-10 cm)        | ≥ 1 cm   | 3826 | mildly suspicious (TR3)     | ACR TI-RADS, ATA, EU TI-RADS, TIRADS (Korea)                                            | cytologically or pathologically confirm |
| Qi 2021                  | 2021 | retrospective study                | 884  | 41.83 yrs (range: 10-73)   | 681/203   | China       | 19.13 mm (range: 5-64)         |          | 1096 | 4a                          | TIRADS (Kwak), ACR TI-RADS, EU TI-RADS, TIRADS (Korea)                                  | cytologically or pathologically confirm |
| Scappaticcio 2021        | 2021 | retrospective analysis             | 36   | 15 yrs (range: 11-17)      | 26/10     | Switzerland | 10 mm (range: 7-13)            |          | 41   | mildly suspicious (TR3)     | ACR TI-RADS, ATA, EU TI-RADS, TIRADS (Korea)                                            | cytologically or pathologically confirm |
| Seifert 2021             | 2021 | retrospective study                | 849  | 51 ± 14 yrs                | 604/249   | Germany     | 26 ± 13 mm                     |          | 1211 | 4c                          | TIRADS (Kwak), ACR TI-RADS, ATA, EU TI-RADS, TIRADS (Korea)                             | cytologically or pathologically confirm |
| Seminati 2021            | 2021 | prospective study                  | 448  | NA                         | NA        | Italy       | NA                             |          | 493  | mildly suspicious (TR3)     | ACR TI-RADS, EU TI-RADS                                                                 | cytologically or pathologically confirm |
| Shi 2021                 | 2021 | retrospective study                | 839  | 54 yrs (range: 14-88)      | 594/245   | China       | 22 mm (range: 14-32)           |          | 846  | 4a                          | TIRADS (Kwak), ACR TI-RADS, EU TI-RADS, TIRADS (Kwak), ACR TI-RADS, ATA, TIRADS (Korea) | cytologically or pathologically confirm |
| Zhang 2021               | 2021 | retrospective study                | 566  | 47.4±13.4 yrs              | 442/124   | China       | 11.4±5.8 mm (range: 5.0-36.0)  |          | 566  | 4a                          | TIRADS (Kwak), ACR TI-RADS, ATA, TIRADS (Korea)                                         | cytologically or pathologically confirm |

|                 |      |                                                                                                               |      |                       |          |          |                                |     |      |                         |                                              |                                         |
|-----------------|------|---------------------------------------------------------------------------------------------------------------|------|-----------------------|----------|----------|--------------------------------|-----|------|-------------------------|----------------------------------------------|-----------------------------------------|
| Zhu 2021        | 2021 | retrospective study                                                                                           | 1697 | 53.2 ± 12.7 yrs       | 1336/361 | China    | 13.1 ± 10.6 mm (range: 0.2-69) | all | 2309 | mildly suspicious (TR3) | ACR TI-RADS, ATA, TIRADS (Korea)             | cytologically or pathologically confirm |
| Alqahtani 2022  | 2022 | retrospective cohort study                                                                                    | 50   | 46.26 ± 2.08 yrs      | 42/8     | Pakistan | NA                             |     | 50   | mildly suspicious (TR3) | ACR TI-RADS                                  | surgical pathology                      |
| Chen 2022       | 2022 | retrospectively review                                                                                        | 1978 | 46.41 ± 12.65 yrs     | 1531/351 | China    | 11.71 ± 8.47 mm (range: 2-73)  |     | 1982 | mildly suspicious (TR3) | ACR TI-RADS, TIRADS (Korea)                  | cytologically or pathologically confirm |
| Lin 2022        | 2022 | retrospective analysis                                                                                        | 329  | 43.5 ± 14.3 yrs       | 216/113  | China    | 3.6 ± 1.7 cm (range: 0.6-12.1) |     | 329  | mildly suspicious (TR3) | ACR TI-RADS, ATA, EU TI-RADS, TIRADS (Korea) | surgical pathology                      |
| Qi 2022         | 2022 | single center retrospective study Case series with prospective data collection and retrospective chart review | 820  | 44.5 ± 13.4 yrs       | 619/201  | China    | 13 mm (range: 11-17)           |     | 820  | 4a                      | TIRADS (Kwak), ACR TI-RADS, ATA              | cytologically or pathologically confirm |
| Theding er 2022 | 2022 |                                                                                                               | 720  | 58.7 ± 0.6 yrs        | 538/182  | USA      | NA                             |     | 949  | mildly suspicious (TR3) | ACR TI-RADS, ATA                             | only cytology                           |
| Zhang 2022      | 2022 | retrospective study                                                                                           | 509  | 48.22 ± 12.31 yrs     | 355/154  | China    | 1.80 cm (range: 0.80-3.40)     |     | 509  | 4a                      | TIRADS (Kwak), ACR TI-RADS                   | cytologically or pathologically confirm |
| Zhang 2022      | 2022 | retrospective study of                                                                                        | 585  | 44 yrs (range: 34-51) | 487/98   | China    | NA                             |     | 585  | Intermediate suspicion  | TIRADS (Korea)                               | surgical pathology                      |

**Supplementary Table S3. Methodological quality of the included studies.**

| Reference                | Risk of Bias      |            |                    |                 | Concerns about Application |            |                    |
|--------------------------|-------------------|------------|--------------------|-----------------|----------------------------|------------|--------------------|
|                          | Patient Selection | Index test | Reference standard | Flow and timing | Patient selection          | Index test | Reference Standard |
| Chng 2015                | Low               | Low        | Low                | Unclear         | Low                        | Low        | Low                |
| Yoon 2015                | Low               | Low        | Low                | Unclear         | Low                        | Low        | Low                |
| Zhang 2015               | Low               | Low        | Low                | Unclear         | Low                        | Low        | Low                |
| Srinivas 2016            | Low               | Low        | Low                | Low             | Low                        | Low        | Low                |
| Ha 2017                  | Low               | Low        | Low                | Unclear         | Low                        | Low        | Low                |
| Mao 2017                 | Low               | Low        | Low                | Unclear         | Low                        | Low        | Low                |
| Ting 2017                | Low               | Low        | Low                | Low             | Low                        | Low        | Low                |
| Trimboli 2017            | Low               | Low        | Low                | Unclear         | Low                        | Low        | Low                |
| Yoon 2017                | Low               | Low        | Low                | Low             | Low                        | Low        | Low                |
| Bae 2018                 | Low               | Low        | Low                | Unclear         | Low                        | Low        | Low                |
| Chng 2018                | Low               | Low        | Low                | Low             | Low                        | Low        | Low                |
| Chng 2018                | Low               | Low        | Low                | Low             | Low                        | Low        | Low                |
| de Macedo 2018           | Low               | Low        | Low                | Unclear         | Low                        | Low        | Low                |
| Ha 2018                  | Low               | Low        | Low                | Low             | Low                        | Low        | Low                |
| Ha 2018                  | Low               | Low        | Low                | Low             | Low                        | Low        | Low                |
| Persichetti 2018         | Low               | Low        | Low                | Unclear         | Low                        | Low        | Low                |
| Ahmadi 2019              | Low               | Low        | Low                | Low             | Low                        | Low        | Low                |
| Barbosa 2019             | Low               | Low        | Low                | Unclear         | Low                        | Low        | Low                |
| Gao 2019                 | Low               | Low        | Low                | Low             | Low                        | Low        | Low                |
| Gitto 2019               | Low               | Low        | Low                | Unclear         | Low                        | Low        | Low                |
| Ha 2019                  | Low               | Low        | Low                | Low             | Low                        | Low        | Low                |
| Ha 2019                  | Low               | Low        | Low                | Unclear         | Low                        | Low        | Low                |
| Hong 2019                | Low               | Low        | Low                | Low             | Low                        | Low        | Low                |
| Li 2019                  | Low               | Low        | Low                | Unclear         | Low                        | Low        | Low                |
| Madsen Barbosa 2019      | Low               | Low        | Low                | Low             | Low                        | Low        | Low                |
| Phuttharak 2019          | Low               | Low        | Low                | Low             | Low                        | Low        | Low                |
| Ruan 2019                | Low               | Low        | Low                | Unclear         | Low                        | Low        | Low                |
| Shen 2019                | Low               | Low        | Low                | Low             | Low                        | Low        | Low                |
| Wu 2019                  | Low               | Low        | Low                | Low             | Low                        | Low        | Low                |
| Wu 2019                  | Low               | Low        | Low                | Unclear         | Low                        | Low        | Low                |
| Xiang 2019               | Low               | Low        | Low                | Unclear         | Low                        | Low        | Low                |
| Xu 2019                  | Low               | Low        | Low                | Unclear         | Low                        | Low        | Low                |
| Yoon 2019                | Low               | Low        | Low                | Unclear         | Low                        | Low        | Low                |
| Huang 2020               | Low               | Low        | Low                | Low             | Low                        | Low        | Low                |
| Koc 2020                 | Low               | Low        | Low                | Unclear         | Low                        | Low        | Low                |
| Peng 2020 (Junior)       | Low               | Low        | Low                | Unclear         | Low                        | Low        | Low                |
| Szczepanek-Parulska 2020 | Low               | Low        | Low                | Low             | Low                        | Low        | Low                |
| Watkins 2020             | Low               | Low        | Low                | Unclear         | Low                        | Low        | Low                |
| Xiao 2020                | Low               | Low        | Low                | Low             | Low                        | Low        | Low                |
| Yang 2020                | Low               | Low        | Low                | Unclear         | Low                        | Low        | Low                |
| Yoo 2020                 | Low               | Low        | Low                | Low             | Low                        | Low        | Low                |
| Yoon 2020                | Low               | Low        | Low                | Unclear         | Low                        | Low        | Low                |
| Zhang 2020               | Low               | Low        | Low                | Unclear         | Low                        | Low        | Low                |
| Celletti                 | Low               | Low        | Low                | Low             | Low                        | Low        | Low                |
| Chen 2021                | Low               | Low        | Low                | Unclear         | Low                        | Low        | Low                |
| Chung 2021               | Low               | Low        | Low                | Low             | Low                        | Low        | Low                |
| da Silva 2021 (cytology) | Low               | Low        | Low                | Unclear         | Low                        | Low        | Low                |
| Ha 2021                  | Low               | Low        | Low                | Low             | Low                        | Low        | Low                |
| Han 2021                 | Low               | Low        | Low                | Low             | Low                        | Low        | Low                |
| Hekimsoy 2021            | Low               | Low        | Low                | Unclear         | Low                        | Low        | Low                |
| Huh 2021                 | Low               | Low        | Low                | Low             | Low                        | Low        | Low                |
| Kang 2021                | Low               | Low        | Low                | Low             | Low                        | Low        | Low                |
| Na 2021                  | Low               | Low        | Low                | Unclear         | Low                        | Low        | Low                |
| Qi 2021                  | Low               | Low        | Low                | Low             | Low                        | Low        | Low                |
| Scappaticcio 2021        | Low               | Low        | Low                | Unclear         | Low                        | Low        | Low                |
| Seifert 2021             | Low               | Low        | Low                | Unclear         | Low                        | Low        | Low                |
| Seminati 2021            | Low               | Low        | Low                | Low             | Low                        | Low        | Low                |
| Shi 2021                 | Low               | Low        | Low                | Unclear         | Low                        | Low        | Low                |
| Zhang 2021               | Low               | Low        | Low                | Low             | Low                        | Low        | Low                |
| Zhu 2021                 | Low               | Low        | Low                | Unclear         | Low                        | Low        | Low                |
| Alqahtani 2022           | Low               | Low        | Low                | Low             | Low                        | Low        | Low                |
| Chen 2022                | Low               | Low        | Low                | Low             | Low                        | Low        | Low                |

|                |     |     |     |         |     |     |     |
|----------------|-----|-----|-----|---------|-----|-----|-----|
| Lin 2022       | Low | Low | Low | Unclear | Low | Low | Low |
| Qi 2022        | Low | Low | Low | Low     | Low | Low | Low |
| Thedinger 2022 | Low | Low | Low | Unclear | Low | Low | Low |
| Zhang 2022     | Low | Low | Low | Unclear | Low | Low | Low |
| Zhang 2022     | Low | Low | Low | Unclear | Low | Low | Low |

---

**Supplementary Table S4. Brief description of the Risk Stratification Systems**

| TIRADS      | Society                             | Year | Description                                                                                                            |
|-------------|-------------------------------------|------|------------------------------------------------------------------------------------------------------------------------|
| K-TIRADS    | Korean Society of Thyroid Radiology | 2016 | Four categories from low to high suspicion<br>Classification according to suspicious US features based on echogenicity |
| ACR-TIRADS  | American College of Radiology       | 2017 | Five categories from benign to highly suspicious<br>US Features with Point Values                                      |
| ATA         | American Thyroid Association        | 2015 | Five categories from benign to high suspicion<br>Atlas of sonographic features for classification of nodules           |
| EU- TIRADS  | European Thyroid Association        | 2017 | Five categories from normal to high risk<br>High suspicion if any of the four characteristics are present              |
| Kwak-TIRADS | Kwak et al.                         | 2011 | Four categories according to the number of<br>suspicious US features                                                   |

**Supplementary Figure S1.** Begg's funnel plot for K-TIRAD.

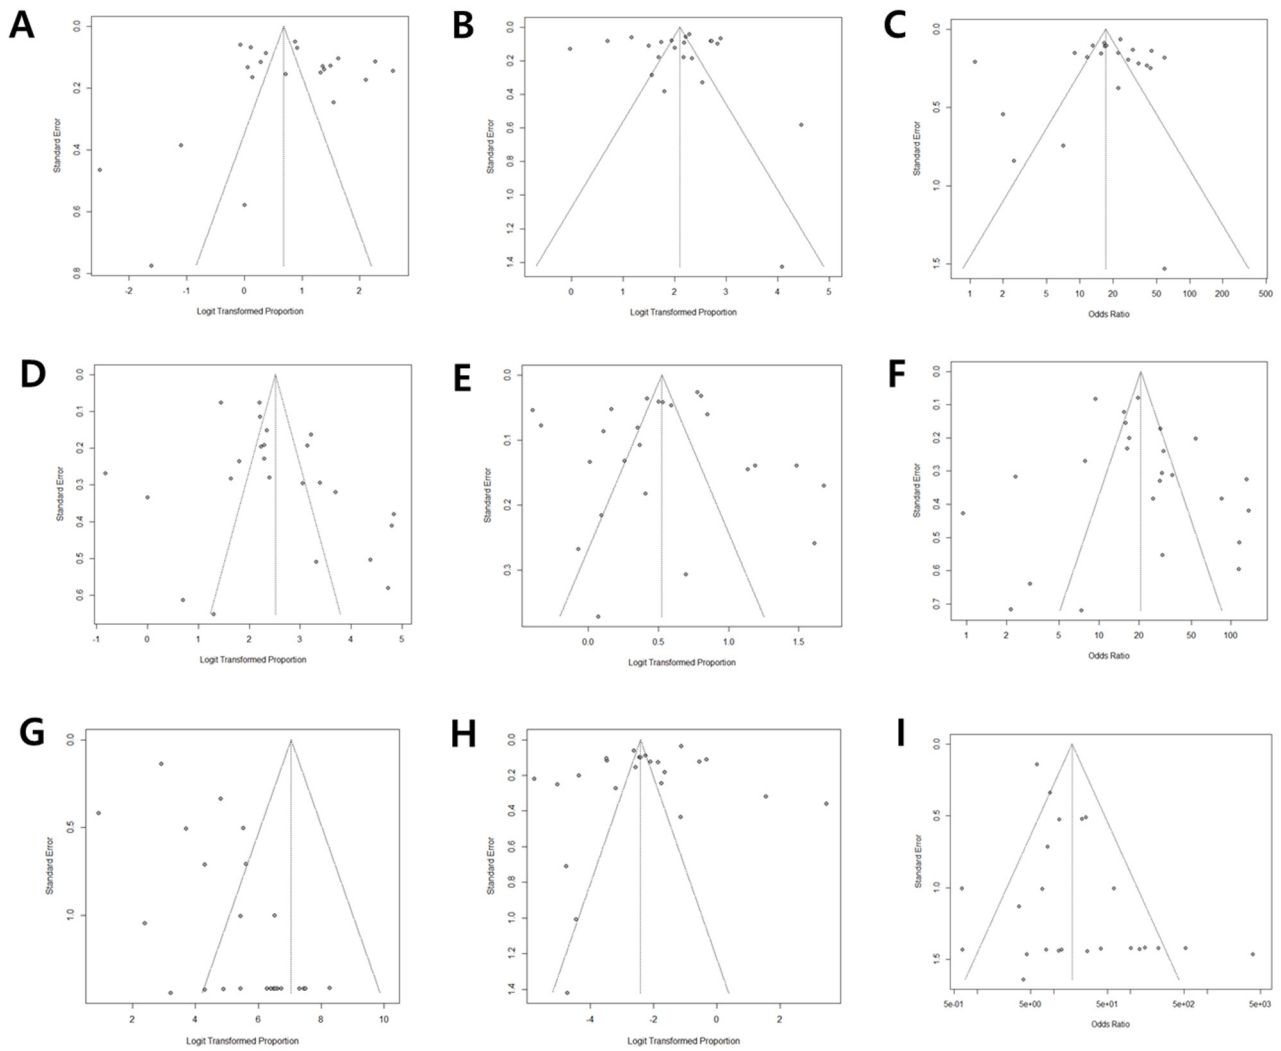

- A. High K-TIRAD, sensitivity
- B. High K-TIRAD, specificity
- C. High K-TIRAD, DOR
- D. Intermediate K-TIRAD, sensitivity
- E. Intermediate K-TIRAD, specificity
- F. Intermediate K-TIRAD, DOR
- G. Low K-TIRAD, sensitivity
- H. Low K-TIRAD, specificity
- I. Low K-TIRAD, DOR

**Supplementary Figure S2.** Begg's funnel plot for ATA

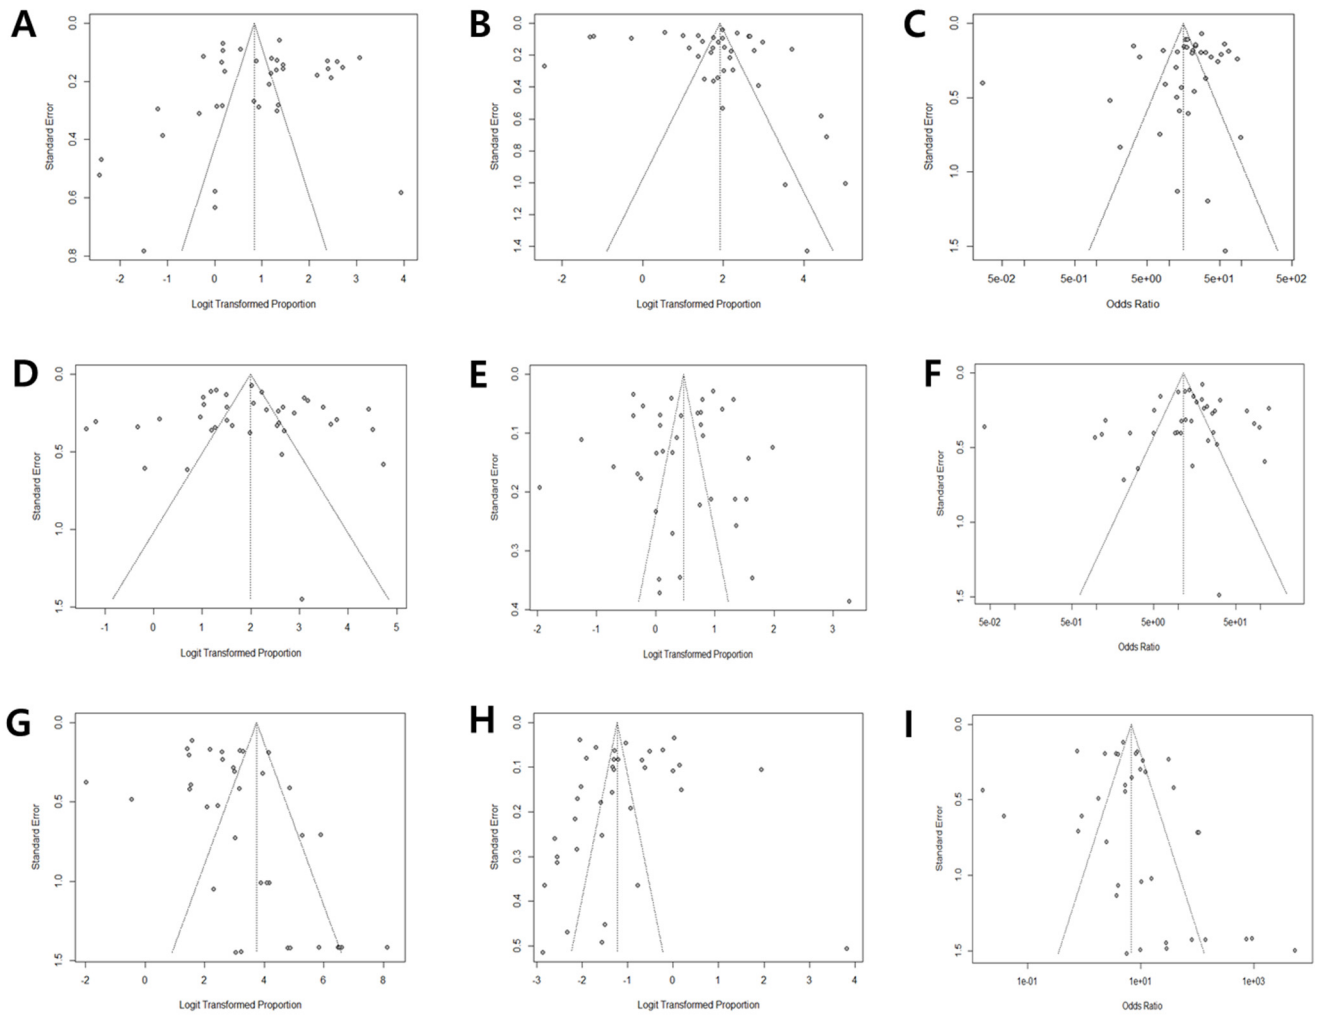

- A. High ATA, sensitivity
- B. High ATA, specificity
- C. High ATA, DOR
- D. Intermediate ATA, sensitivity
- E. Intermediate ATA, specificity
- F. Intermediate ATA, DOR
- G. Low ATA, sensitivity
- H. Low ATA, specificity
- I. Low ATA, DOR



**Supplementary Figure S3.** Begg's funnel plot for ACR

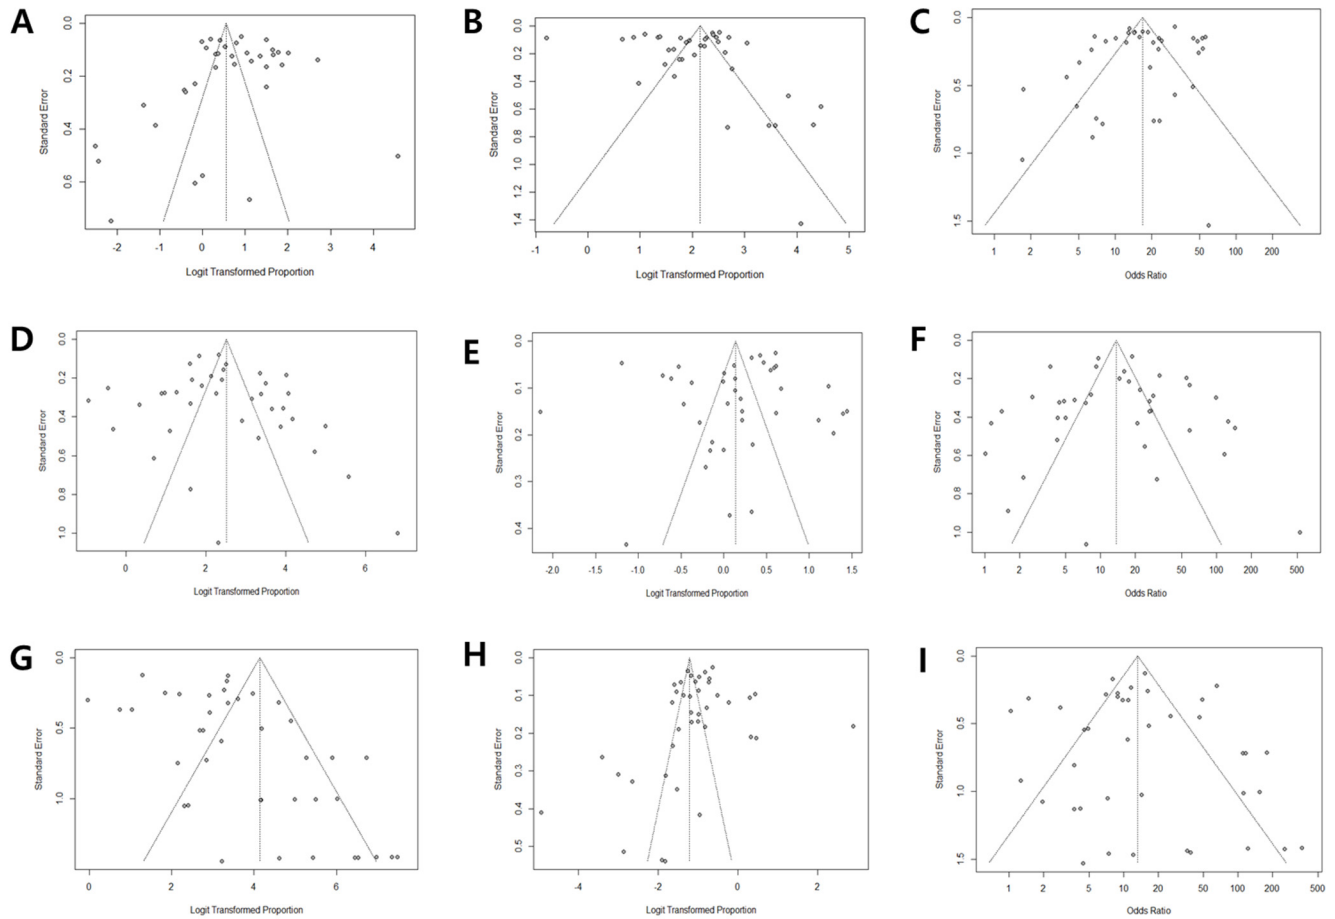

- A. High ACR, sensitivity
- B. High ACR, specificity
- C. High ACR, DOR
- D. Intermediate ACR, sensitivity
- E. Intermediate ACR, specificity
- F. Intermediate ACR, DOR
- G. Low ACR, sensitivity
- H. Low ACR, specificity
- I. Low ACR, DOR

**Supplementary Figure S4.** Begg's funnel plot for EU

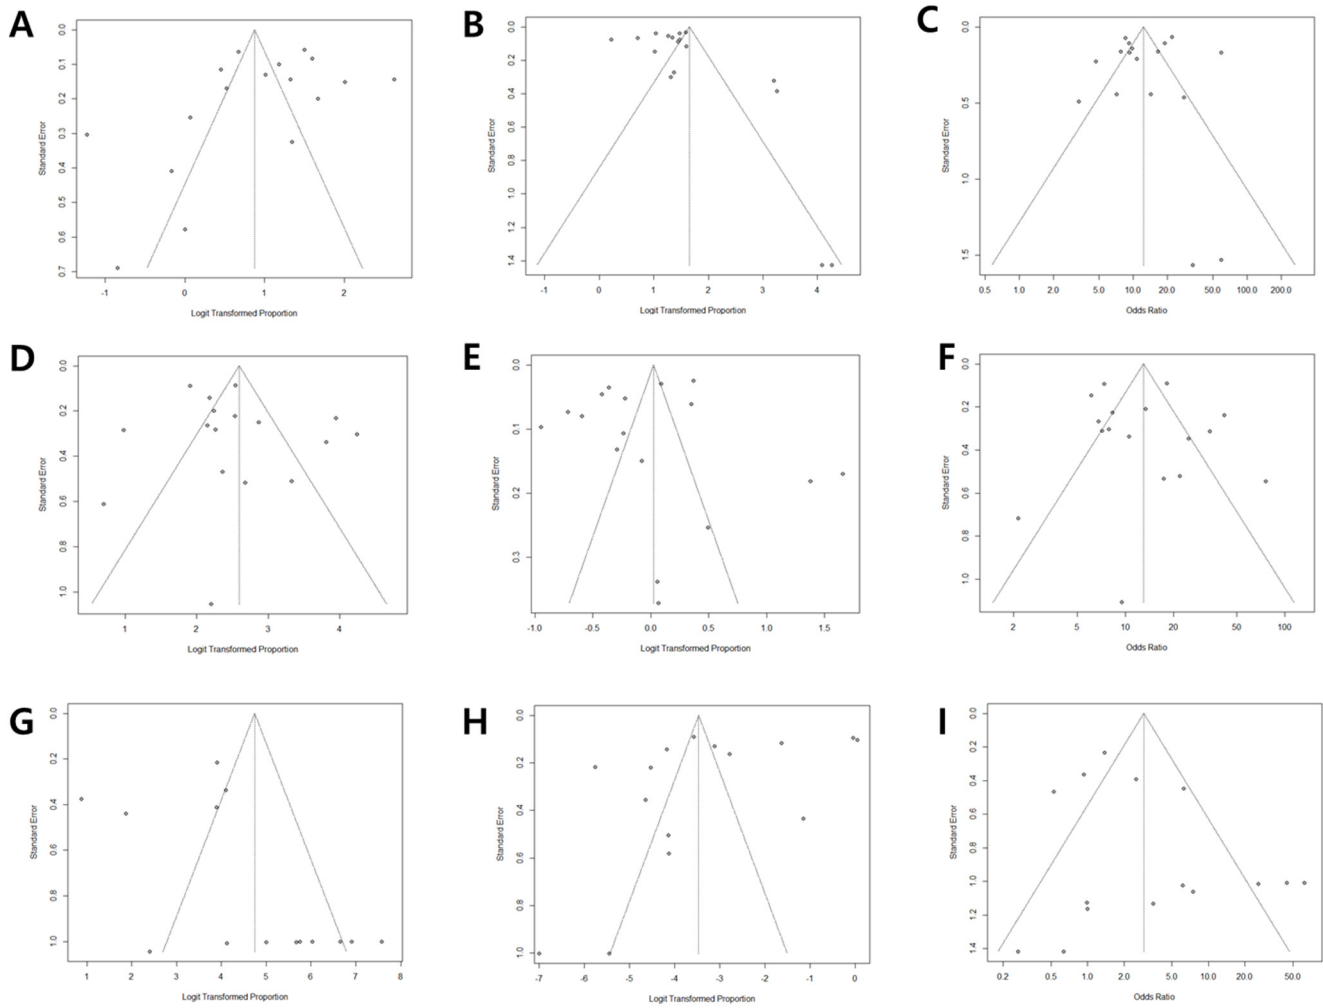

- A. High ATA, sensitivity
- B. High ATA, specificity
- C. High ATA, DOR
- D. Intermediate ATA, sensitivity
- E. Intermediate ATA, specificity
- F. Intermediate ATA, DOR
- G. Low ATA, sensitivity
- H. Low ATA, specificity
- I. Low ATA, DOR

**Supplementary Figure S5.** Begg's funnel plot for Kwak-TIRAD

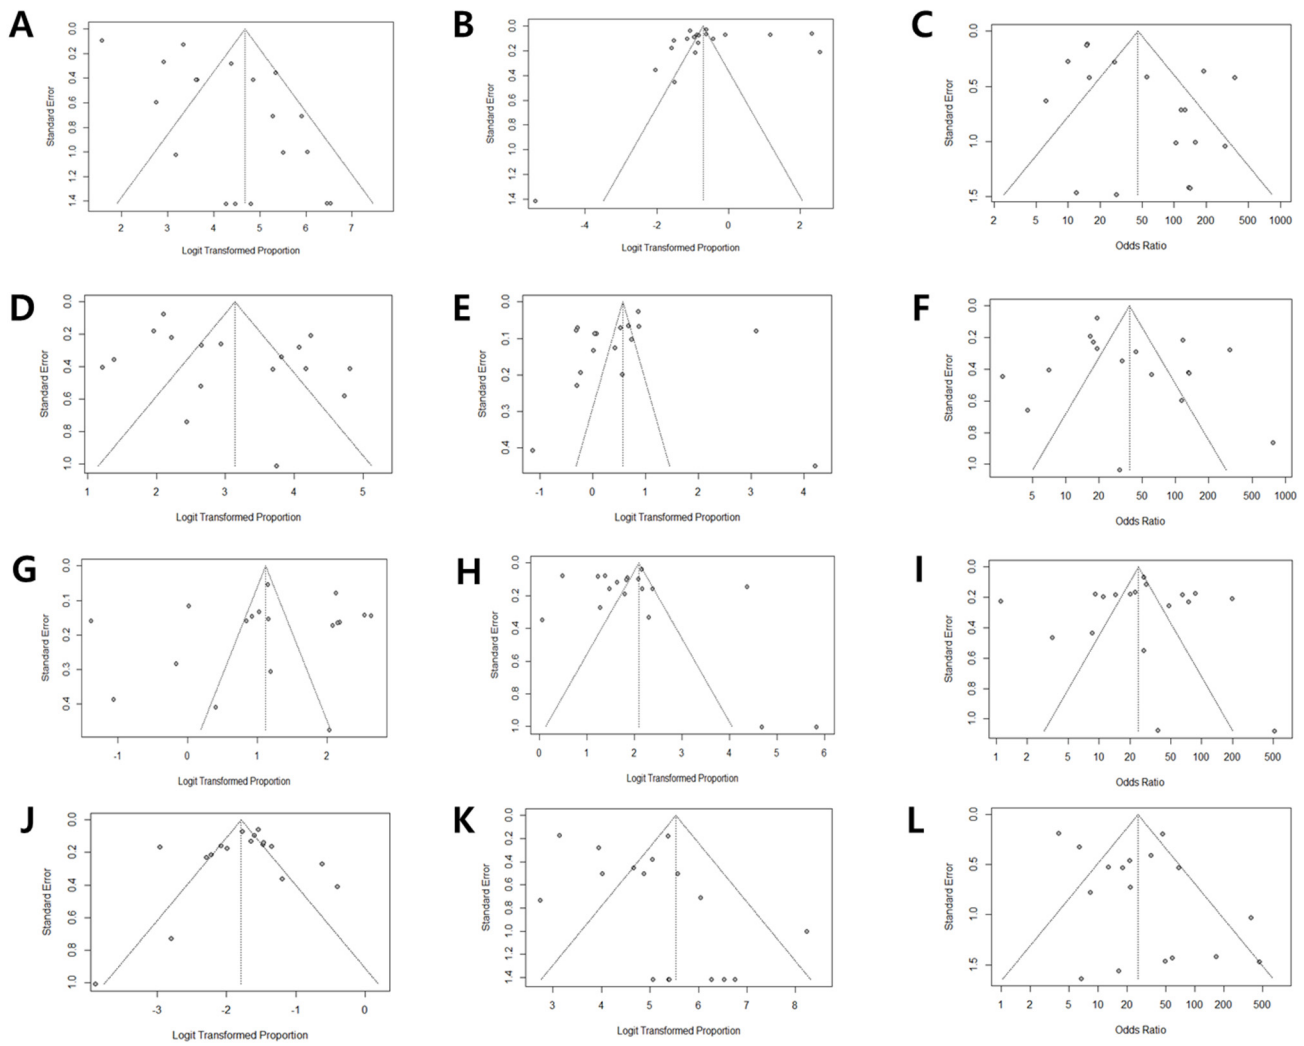

- A. 4a, sensitivity
- B. 4a, specificity
- C. 4a, DOR
- D. 4b, sensitivity
- E. 4b, specificity
- F. 4b, DOR
- G. 4c, sensitivity
- H. 4c, specificity
- I. 4c, DOR
- J. 5, sensitivity
- K. 5, specificity
- L. 5, DOR

**Supplementary Figure S6. Forest plot of the diagnostic odds ratio for ACR**

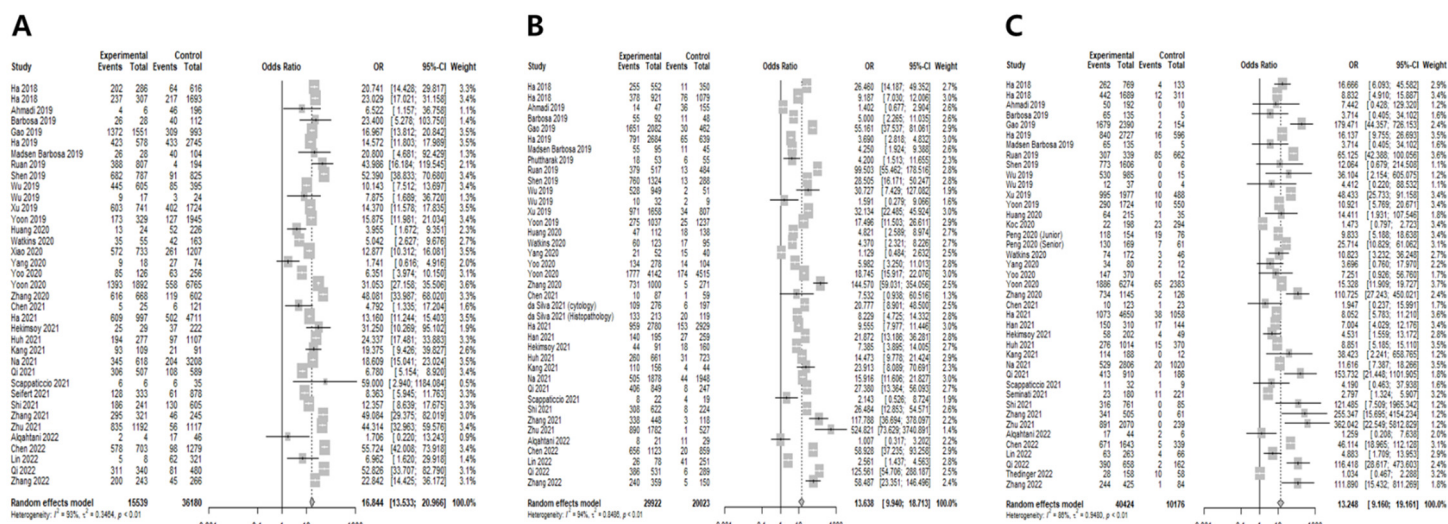

A. High

B. Intermediate

C. Low

**Supplementary Figure S7.** Summary receiver operating characteristic curve for ACR guidelines.

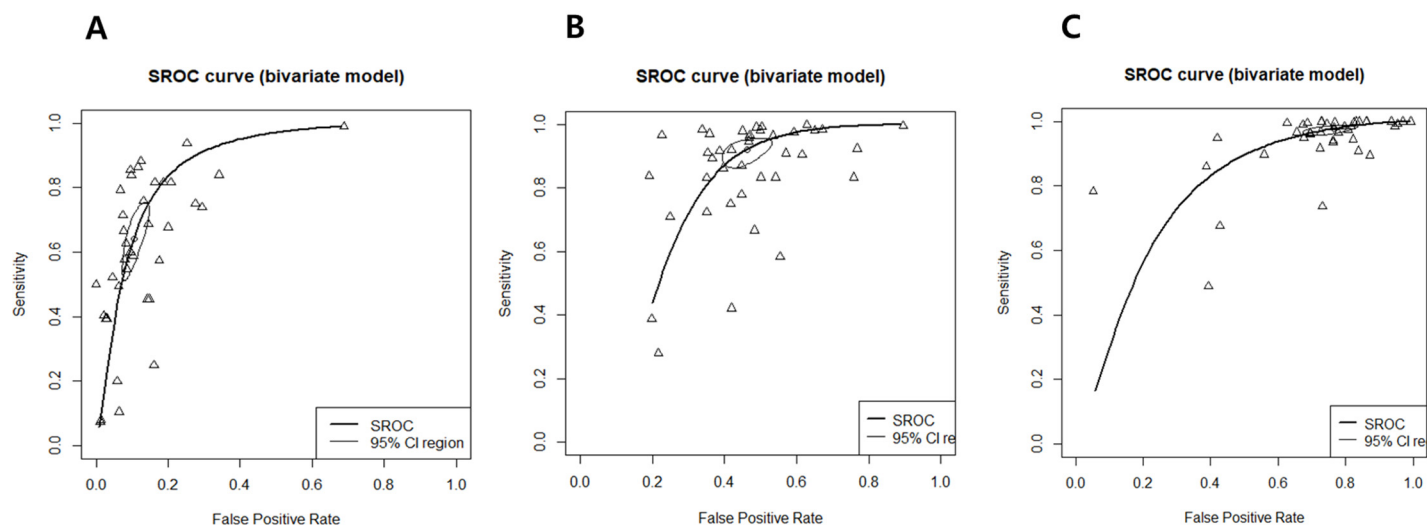

- A. High
- B. Intermediate
- C. Low

Supplementary Figure S8. Forest plot of the diagnostic odds ratio for ATA

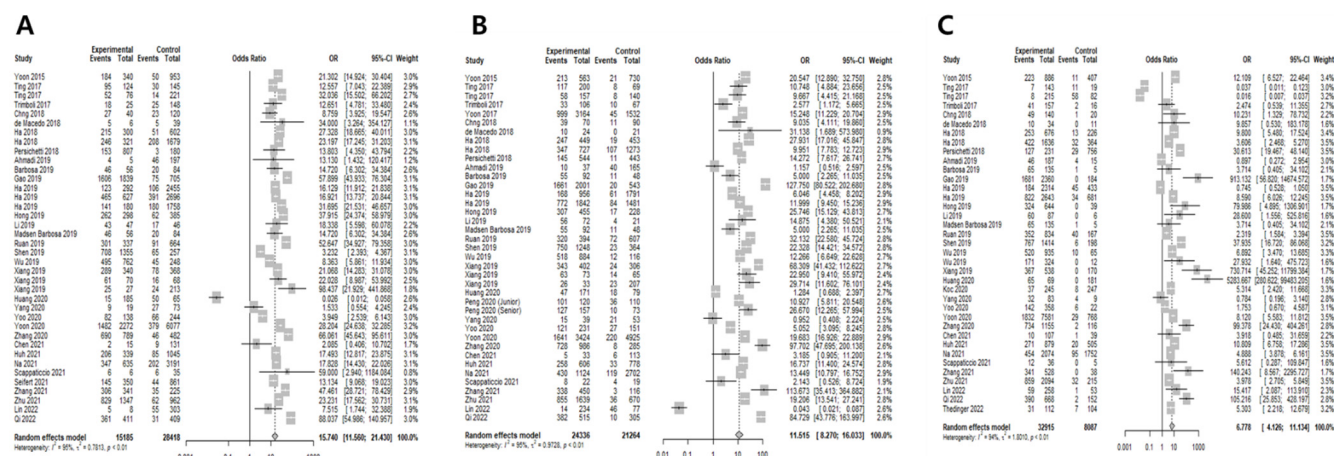

A. High

B. Intermediate

C. Low

**Supplementary Figure S9.** Summary receiver operating characteristic curve for ATA

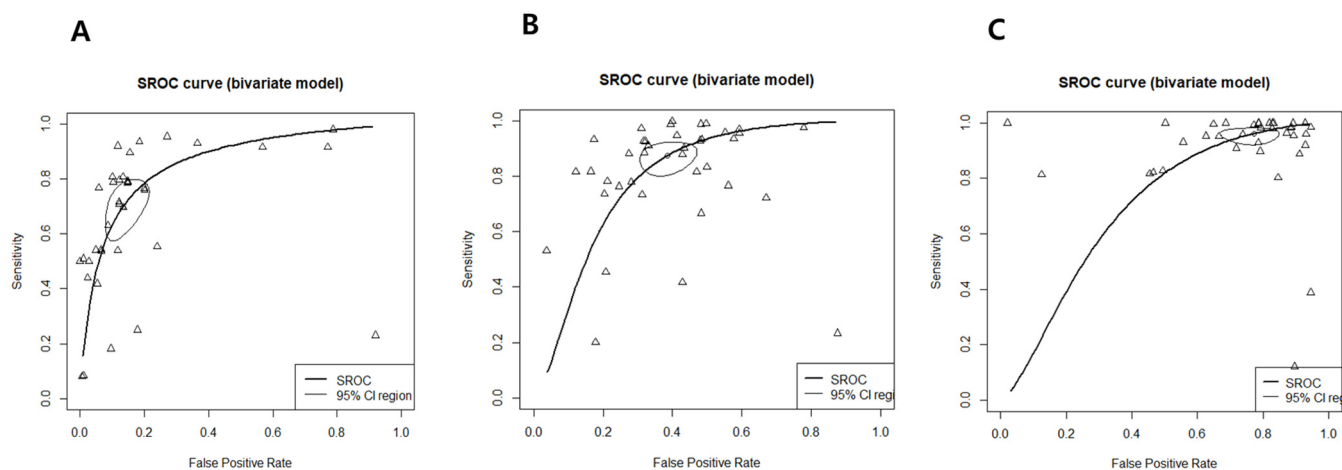

- A. High
- B. Intermediate
- C. Low

**Supplementary Figure S10.** Forest plot of the diagnostic odds ratio for EU

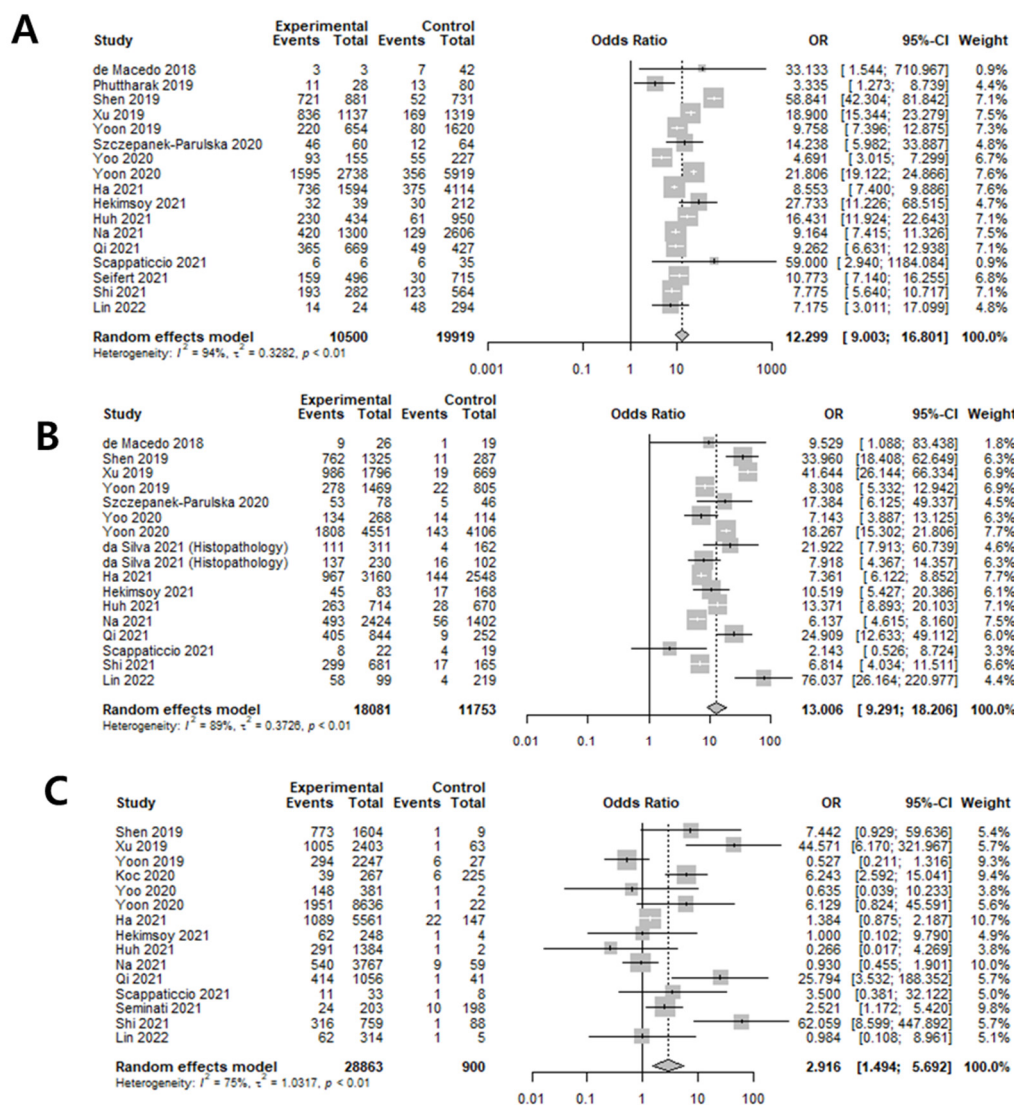

A. High

B. Intermediate

C. Low



**Supplementary Figure S11.** Summary receiver operating characteristic curve for EU

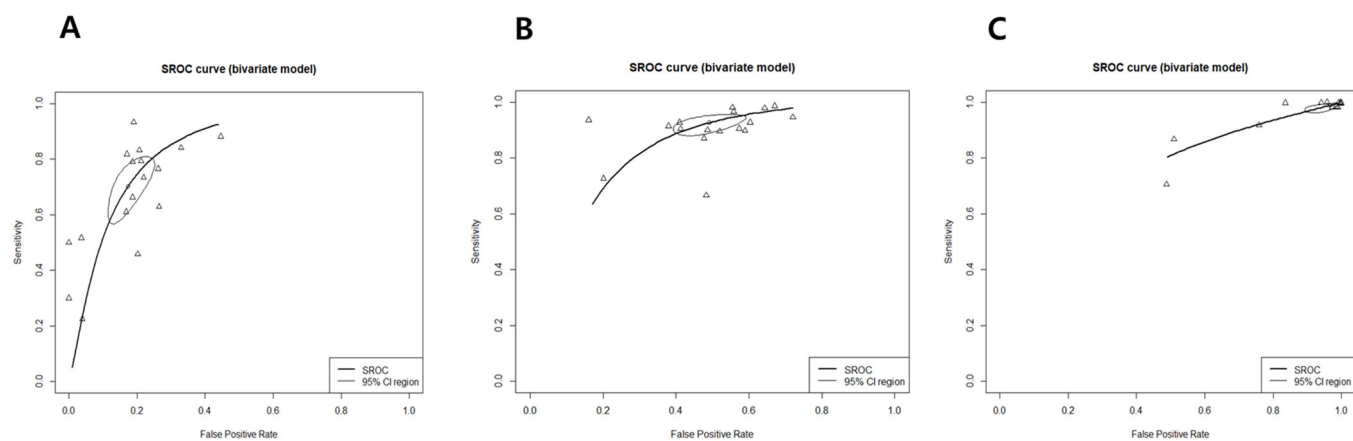

- A. High
- B. Intermediate
- C. Low

**Supplementary Figure S12.** Forest plot of the diagnostic odds ratio for Kwak-TIRAD

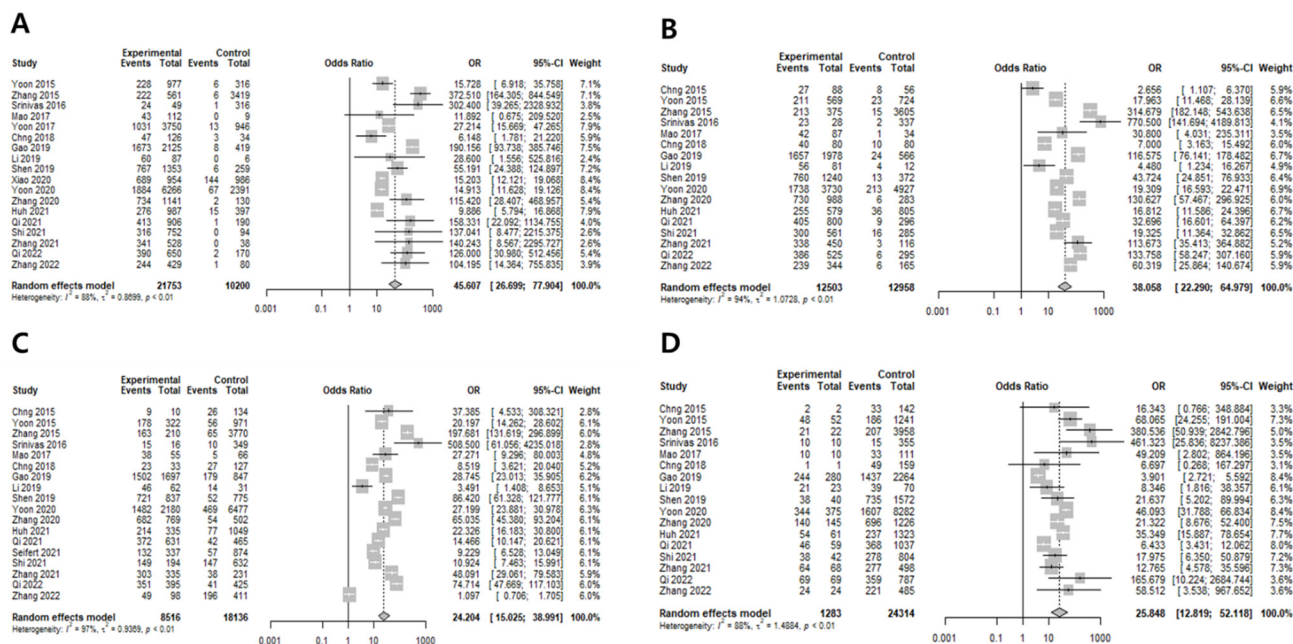

A. 4A

B. 4B

C. 4C

D. 5

**Supplementary Figure S13.** Summary receiver operating characteristic curve for Kwak-TIRAD

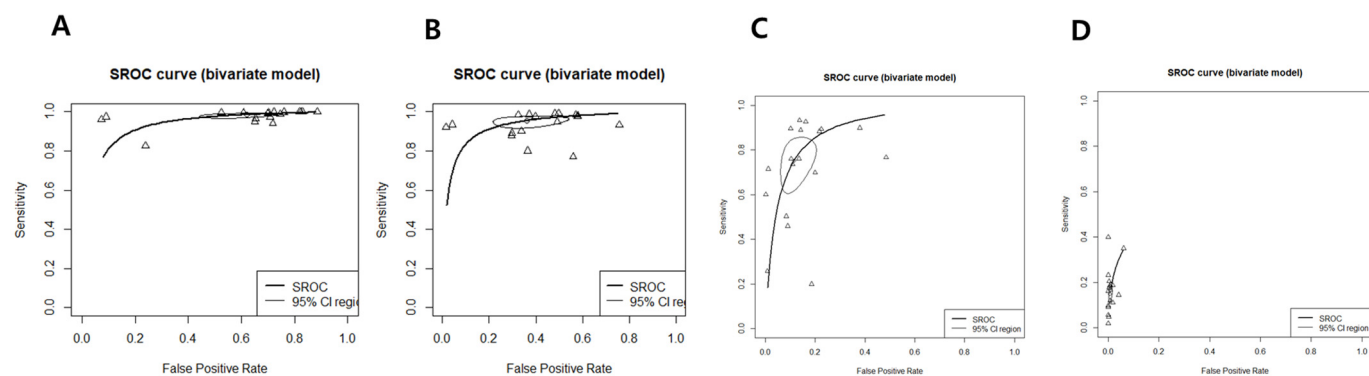

- A. 4A
- B. 4B
- C. 4C
- D. 5
